# Supplementary material for: Plasma N-glycome shows continuous deterioration as the diagnosis of insulin resistance approaches
Source: BMJ Open Diabetes Res Care. 2021 Sep 9;9(1):e002263. doi: 10.1136/bmjdrc-2021-002263 (PMC8438737; doi:10.1136/bmjdrc-2021-002263)
Supplement: Supplementary data [file bmjdrc-2021-002263supp002.xlsx]

## Sheet: Glycan
threshold	specificity	sensitivity	youden	tn	tp	fn	fp
-Inf	0	1	1	0	81	0	445
0.00343718	0.00224719	1	1.00225	1	81	0	444
0.00568543	0.00449438	1	1.00449	2	81	0	443
0.00580444	0.00674157	1	1.00674	3	81	0	442
0.00601178	0.00898876	1	1.00899	4	81	0	441
0.00633726	0.011236	1	1.01124	5	81	0	440
0.00705073	0.0134831	1	1.01348	6	81	0	439
0.00799527	0.0157303	1	1.01573	7	81	0	438
0.00859734	0.0179775	1	1.01798	8	81	0	437
0.00937608	0.0202247	1	1.02022	9	81	0	436
0.0100927	0.0224719	1	1.02247	10	81	0	435
0.0106018	0.0247191	1	1.02472	11	81	0	434
0.0112346	0.0269663	1	1.02697	12	81	0	433
0.0120539	0.0292135	1	1.02921	13	81	0	432
0.0129015	0.0314607	1	1.03146	14	81	0	431
0.0135347	0.0337079	1	1.03371	15	81	0	430
0.0148525	0.0359551	1	1.03596	16	81	0	429
0.0159229	0.0382022	1	1.0382	17	81	0	428
0.0160554	0.0404494	1	1.04045	18	81	0	427
0.0161477	0.0404494	0.987654	1.0281	18	80	1	427
0.016527	0.0426966	0.987654	1.03035	19	80	1	426
0.0174742	0.0426966	0.975309	1.01801	19	79	2	426
0.0182668	0.0449438	0.975309	1.02025	20	79	2	425
0.0186284	0.047191	0.975309	1.0225	21	79	2	424
0.0195289	0.0494382	0.975309	1.02475	22	79	2	423
0.0203214	0.0516854	0.975309	1.02699	23	79	2	422
0.0209202	0.0539326	0.975309	1.02924	24	79	2	421
0.0215705	0.0561798	0.975309	1.03149	25	79	2	420
0.0218468	0.058427	0.975309	1.03374	26	79	2	419
0.0220312	0.0606742	0.975309	1.03598	27	79	2	418
0.0220599	0.0629213	0.975309	1.03823	28	79	2	417
0.0220901	0.0651685	0.975309	1.04048	29	79	2	416
0.0221931	0.0674157	0.975309	1.04272	30	79	2	415
0.0226135	0.0696629	0.975309	1.04497	31	79	2	414
0.0234746	0.0719101	0.975309	1.04722	32	79	2	413
0.0244882	0.0719101	0.962963	1.03487	32	78	3	413
0.0252155	0.0741573	0.962963	1.03712	33	78	3	412
0.0257084	0.0764045	0.962963	1.03937	34	78	3	411
0.0260234	0.0786517	0.962963	1.04161	35	78	3	410
0.0261041	0.0808989	0.962963	1.04386	36	78	3	409
0.0261487	0.0831461	0.962963	1.04611	37	78	3	408
0.0263321	0.0853933	0.962963	1.04836	38	78	3	407
0.0265137	0.0876404	0.962963	1.0506	39	78	3	406
0.0267146	0.0898876	0.962963	1.05285	40	78	3	405
0.0269964	0.0921348	0.962963	1.0551	41	78	3	404
0.0274629	0.094382	0.962963	1.05734	42	78	3	403
0.0278355	0.0966292	0.962963	1.05959	43	78	3	402
0.0281148	0.0988764	0.962963	1.06184	44	78	3	401
0.0287193	0.101124	0.962963	1.06409	45	78	3	400
0.0297229	0.103371	0.962963	1.06633	46	78	3	399
0.030482	0.105618	0.962963	1.06858	47	78	3	398
0.0306835	0.107865	0.962963	1.07083	48	78	3	397
0.0308001	0.110112	0.962963	1.07308	49	78	3	396
0.0308389	0.11236	0.962963	1.07532	50	78	3	395
0.0310298	0.114607	0.962963	1.07757	51	78	3	394
0.0314289	0.116854	0.962963	1.07982	52	78	3	393
0.0321022	0.119101	0.962963	1.08206	53	78	3	392
0.0325743	0.121348	0.962963	1.08431	54	78	3	391
0.0327559	0.123596	0.962963	1.08656	55	78	3	390
0.0332287	0.125843	0.962963	1.08881	56	78	3	389
0.0335664	0.12809	0.962963	1.09105	57	78	3	388
0.0338132	0.130337	0.962963	1.0933	58	78	3	387
0.034295	0.132584	0.962963	1.09555	59	78	3	386
0.0346736	0.134831	0.962963	1.09779	60	78	3	385
0.0348063	0.137079	0.962963	1.10004	61	78	3	384
0.0349542	0.139326	0.962963	1.10229	62	78	3	383
0.0351424	0.141573	0.962963	1.10454	63	78	3	382
0.0353005	0.14382	0.962963	1.10678	64	78	3	381
0.0357243	0.146067	0.962963	1.10903	65	78	3	380
0.0360749	0.148315	0.962963	1.11128	66	78	3	379
0.036131	0.150562	0.962963	1.11352	67	78	3	378
0.0362069	0.152809	0.962963	1.11577	68	78	3	377
0.036328	0.155056	0.962963	1.11802	69	78	3	376
0.0367251	0.157303	0.962963	1.12027	70	78	3	375
0.0373224	0.159551	0.962963	1.12251	71	78	3	374
0.0376843	0.159551	0.950617	1.11017	71	77	4	374
0.0379611	0.161798	0.950617	1.11242	72	77	4	373
0.0381597	0.164045	0.950617	1.11466	73	77	4	372
0.0383958	0.166292	0.950617	1.11691	74	77	4	371
0.0386168	0.168539	0.950617	1.11916	75	77	4	370
0.038698	0.170787	0.950617	1.1214	76	77	4	369
0.039118	0.173034	0.950617	1.12365	77	77	4	368
0.0399253	0.175281	0.950617	1.1259	78	77	4	367
0.0411094	0.177528	0.950617	1.12815	79	77	4	366
0.0419582	0.179775	0.950617	1.13039	80	77	4	365
0.0421792	0.182022	0.950617	1.13264	81	77	4	364
0.0423901	0.18427	0.950617	1.13489	82	77	4	363
0.042542	0.186517	0.950617	1.13713	83	77	4	362
0.0425911	0.188764	0.950617	1.13938	84	77	4	361
0.0430157	0.191011	0.950617	1.14163	85	77	4	360
0.0436369	0.193258	0.950617	1.14388	86	77	4	359
0.0442688	0.195506	0.950617	1.14612	87	77	4	358
0.0448173	0.197753	0.950617	1.14837	88	77	4	357
0.045194	0.2	0.950617	1.15062	89	77	4	356
0.045484	0.202247	0.950617	1.15286	90	77	4	355
0.0457193	0.204494	0.950617	1.15511	91	77	4	354
0.0459845	0.206742	0.950617	1.15736	92	77	4	353
0.0469688	0.208989	0.950617	1.15961	93	77	4	352
0.0483646	0.211236	0.950617	1.16185	94	77	4	351
0.0493383	0.213483	0.950617	1.1641	95	77	4	350
0.050174	0.21573	0.950617	1.16635	96	77	4	349
0.0505306	0.217978	0.950617	1.16859	97	77	4	348
0.0506095	0.220225	0.950617	1.17084	98	77	4	347
0.0508729	0.222472	0.950617	1.17309	99	77	4	346
0.0511083	0.222472	0.938272	1.16074	99	76	5	346
0.051179	0.224719	0.938272	1.16299	100	76	5	345
0.0512483	0.226966	0.938272	1.16524	101	76	5	344
0.0513413	0.229213	0.938272	1.16749	102	76	5	343
0.0515334	0.231461	0.938272	1.16973	103	76	5	342
0.0517873	0.233708	0.938272	1.17198	104	76	5	341
0.0519053	0.235955	0.938272	1.17423	105	76	5	340
0.0520725	0.238202	0.938272	1.17647	106	76	5	339
0.0522431	0.240449	0.938272	1.17872	107	76	5	338
0.0523801	0.242697	0.938272	1.18097	108	76	5	337
0.0526015	0.244944	0.938272	1.18322	109	76	5	336
0.0528396	0.247191	0.938272	1.18546	110	76	5	335
0.0529876	0.249438	0.938272	1.18771	111	76	5	334
0.0532189	0.251685	0.938272	1.18996	112	76	5	333
0.0534785	0.253933	0.938272	1.1922	113	76	5	332
0.0535896	0.25618	0.938272	1.19445	114	76	5	331
0.0538769	0.258427	0.938272	1.1967	115	76	5	330
0.0542642	0.260674	0.938272	1.19895	116	76	5	329
0.054695	0.262921	0.938272	1.20119	117	76	5	328
0.0550396	0.265169	0.938272	1.20344	118	76	5	327
0.0552507	0.267416	0.938272	1.20569	119	76	5	326
0.0555002	0.269663	0.938272	1.20793	120	76	5	325
0.0558665	0.27191	0.938272	1.21018	121	76	5	324
0.0561448	0.274157	0.938272	1.21243	122	76	5	323
0.0562362	0.276404	0.938272	1.21468	123	76	5	322
0.0564149	0.278652	0.938272	1.21692	124	76	5	321
0.0571049	0.280899	0.938272	1.21917	125	76	5	320
0.0576953	0.283146	0.938272	1.22142	126	76	5	319
0.0577297	0.285393	0.938272	1.22366	127	76	5	318
0.057836	0.28764	0.938272	1.22591	128	76	5	317
0.0579458	0.289888	0.938272	1.22816	129	76	5	316
0.0580482	0.292135	0.938272	1.23041	130	76	5	315
0.0581779	0.294382	0.938272	1.23265	131	76	5	314
0.058339	0.296629	0.938272	1.2349	132	76	5	313
0.0586465	0.298876	0.938272	1.23715	133	76	5	312
0.0591042	0.301124	0.938272	1.2394	134	76	5	311
0.0594046	0.303371	0.938272	1.24164	135	76	5	310
0.0596029	0.305618	0.938272	1.24389	136	76	5	309
0.0598353	0.307865	0.938272	1.24614	137	76	5	308
0.0601629	0.310112	0.938272	1.24838	138	76	5	307
0.0608307	0.31236	0.938272	1.25063	139	76	5	306
0.061361	0.314607	0.938272	1.25288	140	76	5	305
0.0616938	0.316854	0.938272	1.25513	141	76	5	304
0.0626048	0.319101	0.938272	1.25737	142	76	5	303
0.0643054	0.321348	0.938272	1.25962	143	76	5	302
0.0658963	0.323596	0.938272	1.26187	144	76	5	301
0.0668125	0.325843	0.938272	1.26411	145	76	5	300
0.0672781	0.32809	0.938272	1.26636	146	76	5	299
0.0674313	0.330337	0.938272	1.26861	147	76	5	298
0.067768	0.332584	0.938272	1.27086	148	76	5	297
0.0681698	0.334831	0.938272	1.2731	149	76	5	296
0.0684344	0.337079	0.938272	1.27535	150	76	5	295
0.0687502	0.339326	0.938272	1.2776	151	76	5	294
0.0697494	0.341573	0.938272	1.27984	152	76	5	293
0.0708833	0.34382	0.938272	1.28209	153	76	5	292
0.0712171	0.346067	0.938272	1.28434	154	76	5	291
0.0713451	0.348315	0.938272	1.28659	155	76	5	290
0.0714959	0.350562	0.938272	1.28883	156	76	5	289
0.0717292	0.352809	0.938272	1.29108	157	76	5	288
0.0721101	0.355056	0.938272	1.29333	158	76	5	287
0.0726944	0.357303	0.938272	1.29557	159	76	5	286
0.0739445	0.359551	0.938272	1.29782	160	76	5	285
0.0749819	0.361798	0.938272	1.30007	161	76	5	284
0.0754295	0.364045	0.938272	1.30232	162	76	5	283
0.0758108	0.364045	0.925926	1.28997	162	75	6	283
0.0762021	0.366292	0.925926	1.29222	163	75	6	282
0.0766994	0.368539	0.925926	1.29447	164	75	6	281
0.0771943	0.370787	0.925926	1.29671	165	75	6	280
0.0775778	0.373034	0.925926	1.29896	166	75	6	279
0.0779382	0.375281	0.925926	1.30121	167	75	6	278
0.0783353	0.377528	0.925926	1.30345	168	75	6	277
0.0787152	0.379775	0.925926	1.3057	169	75	6	276
0.0793213	0.382022	0.925926	1.30795	170	75	6	275
0.079998	0.382022	0.91358	1.2956	170	74	7	275
0.0805761	0.38427	0.91358	1.29785	171	74	7	274
0.0808838	0.38427	0.901235	1.2855	171	73	8	274
0.0811121	0.386517	0.901235	1.28775	172	73	8	273
0.0816352	0.388764	0.901235	1.29	173	73	8	272
0.0821569	0.388764	0.888889	1.27765	173	72	9	272
0.0823451	0.391011	0.888889	1.2799	174	72	9	271
0.0828383	0.393258	0.888889	1.28215	175	72	9	270
0.0836676	0.395506	0.888889	1.28439	176	72	9	269
0.0841971	0.397753	0.888889	1.28664	177	72	9	268
0.0845781	0.4	0.888889	1.28889	178	72	9	267
0.0848757	0.402247	0.888889	1.29114	179	72	9	266
0.0850465	0.404494	0.888889	1.29338	180	72	9	265
0.0853424	0.406742	0.888889	1.29563	181	72	9	264
0.0856028	0.408989	0.888889	1.29788	182	72	9	263
0.0858156	0.411236	0.888889	1.30012	183	72	9	262
0.0860569	0.413483	0.888889	1.30237	184	72	9	261
0.0863564	0.41573	0.888889	1.30462	185	72	9	260
0.0866011	0.417978	0.888889	1.30687	186	72	9	259
0.0867334	0.420225	0.888889	1.30911	187	72	9	258
0.0869125	0.422472	0.888889	1.31136	188	72	9	257
0.0871009	0.424719	0.888889	1.31361	189	72	9	256
0.0873701	0.426966	0.888889	1.31586	190	72	9	255
0.0875832	0.429213	0.888889	1.3181	191	72	9	254
0.0876803	0.431461	0.888889	1.32035	192	72	9	253
0.0883868	0.433708	0.888889	1.3226	193	72	9	252
0.0894818	0.435955	0.888889	1.32484	194	72	9	251
0.0900009	0.438202	0.888889	1.32709	195	72	9	250
0.0903802	0.440449	0.888889	1.32934	196	72	9	249
0.0907958	0.440449	0.876543	1.31699	196	71	10	249
0.0909018	0.442697	0.876543	1.31924	197	71	10	248
0.0910355	0.444944	0.876543	1.32149	198	71	10	247
0.0914472	0.447191	0.876543	1.32373	199	71	10	246
0.091743	0.449438	0.876543	1.32598	200	71	10	245
0.0918959	0.451685	0.876543	1.32823	201	71	10	244
0.0925574	0.453933	0.876543	1.33048	202	71	10	243
0.0932983	0.45618	0.876543	1.33272	203	71	10	242
0.0935406	0.458427	0.876543	1.33497	204	71	10	241
0.093691	0.460674	0.876543	1.33722	205	71	10	240
0.0939047	0.462921	0.876543	1.33946	206	71	10	239
0.0940893	0.465169	0.876543	1.34171	207	71	10	238
0.0945238	0.467416	0.876543	1.34396	208	71	10	237
0.0952269	0.469663	0.876543	1.34621	209	71	10	236
0.0960035	0.47191	0.876543	1.34845	210	71	10	235
0.0969824	0.474157	0.876543	1.3507	211	71	10	234
0.097857	0.476404	0.876543	1.35295	212	71	10	233
0.0981821	0.476404	0.864198	1.3406	212	70	11	233
0.0982101	0.478652	0.864198	1.34285	213	70	11	232
0.0983742	0.480899	0.864198	1.3451	214	70	11	231
0.0987464	0.483146	0.864198	1.34734	215	70	11	230
0.0995987	0.485393	0.864198	1.34959	216	70	11	229
0.100658	0.48764	0.864198	1.35184	217	70	11	228
0.101199	0.489888	0.864198	1.35409	218	70	11	227
0.102228	0.492135	0.864198	1.35633	219	70	11	226
0.103166	0.494382	0.864198	1.35858	220	70	11	225
0.103226	0.496629	0.864198	1.36083	221	70	11	224
0.103503	0.498876	0.864198	1.36307	222	70	11	223
0.103888	0.501124	0.864198	1.36532	223	70	11	222
0.104215	0.503371	0.864198	1.36757	224	70	11	221
0.104422	0.505618	0.864198	1.36982	225	70	11	220
0.104691	0.507865	0.864198	1.37206	226	70	11	219
0.105395	0.510112	0.864198	1.37431	227	70	11	218
0.105994	0.51236	0.864198	1.37656	228	70	11	217
0.106251	0.514607	0.864198	1.3788	229	70	11	216
0.106756	0.516854	0.864198	1.38105	230	70	11	215
0.107339	0.519101	0.864198	1.3833	231	70	11	214
0.108096	0.521348	0.864198	1.38555	232	70	11	213
0.108972	0.523596	0.864198	1.38779	233	70	11	212
0.109624	0.525843	0.864198	1.39004	234	70	11	211
0.109972	0.52809	0.864198	1.39229	235	70	11	210
0.110024	0.530337	0.864198	1.39453	236	70	11	209
0.11025	0.532584	0.864198	1.39678	237	70	11	208
0.110606	0.534831	0.864198	1.39903	238	70	11	207
0.110784	0.537079	0.864198	1.40128	239	70	11	206
0.110901	0.539326	0.864198	1.40352	240	70	11	205
0.111061	0.541573	0.864198	1.40577	241	70	11	204
0.111481	0.54382	0.864198	1.40802	242	70	11	203
0.111958	0.54382	0.851852	1.39567	242	69	12	203
0.112069	0.546067	0.851852	1.39792	243	69	12	202
0.112437	0.548315	0.851852	1.40017	244	69	12	201
0.1133	0.550562	0.851852	1.40241	245	69	12	200
0.113817	0.552809	0.851852	1.40466	246	69	12	199
0.114729	0.555056	0.851852	1.40691	247	69	12	198
0.115728	0.555056	0.839506	1.39456	247	68	13	198
0.116827	0.557303	0.839506	1.39681	248	68	13	197
0.11787	0.559551	0.839506	1.39906	249	68	13	196
0.118062	0.561798	0.839506	1.4013	250	68	13	195
0.11822	0.564045	0.839506	1.40355	251	68	13	194
0.118335	0.566292	0.839506	1.4058	252	68	13	193
0.118456	0.568539	0.839506	1.40805	253	68	13	192
0.118723	0.570787	0.839506	1.41029	254	68	13	191
0.119045	0.570787	0.82716	1.39795	254	67	14	191
0.119811	0.573034	0.82716	1.40019	255	67	14	190
0.120514	0.575281	0.82716	1.40244	256	67	14	189
0.120852	0.577528	0.82716	1.40469	257	67	14	188
0.121255	0.579775	0.82716	1.40694	258	67	14	187
0.122064	0.582022	0.82716	1.40918	259	67	14	186
0.122802	0.58427	0.82716	1.41143	260	67	14	185
0.122868	0.586517	0.82716	1.41368	261	67	14	184
0.122951	0.588764	0.82716	1.41592	262	67	14	183
0.124308	0.591011	0.82716	1.41817	263	67	14	182
0.125809	0.593258	0.82716	1.42042	264	67	14	181
0.126055	0.595506	0.82716	1.42267	265	67	14	180
0.126578	0.597753	0.82716	1.42491	266	67	14	179
0.127374	0.6	0.82716	1.42716	267	67	14	178
0.127824	0.602247	0.82716	1.42941	268	67	14	177
0.128968	0.604494	0.82716	1.43165	269	67	14	176
0.130176	0.606742	0.82716	1.4339	270	67	14	175
0.130443	0.608989	0.82716	1.43615	271	67	14	174
0.130774	0.611236	0.82716	1.4384	272	67	14	173
0.131301	0.613483	0.82716	1.44064	273	67	14	172
0.131724	0.61573	0.82716	1.44289	274	67	14	171
0.131852	0.617978	0.82716	1.44514	275	67	14	170
0.132633	0.620225	0.82716	1.44739	276	67	14	169
0.133602	0.622472	0.82716	1.44963	277	67	14	168
0.133885	0.624719	0.82716	1.45188	278	67	14	167
0.134276	0.626966	0.82716	1.45413	279	67	14	166
0.135211	0.629213	0.82716	1.45637	280	67	14	165
0.136128	0.631461	0.82716	1.45862	281	67	14	164
0.136451	0.633708	0.82716	1.46087	282	67	14	163
0.136572	0.635955	0.82716	1.46312	283	67	14	162
0.136728	0.638202	0.82716	1.46536	284	67	14	161
0.137368	0.640449	0.82716	1.46761	285	67	14	160
0.138183	0.642697	0.82716	1.46986	286	67	14	159
0.138884	0.644944	0.82716	1.4721	287	67	14	158
0.139655	0.647191	0.82716	1.47435	288	67	14	157
0.140073	0.649438	0.82716	1.4766	289	67	14	156
0.1405	0.651685	0.82716	1.47885	290	67	14	155
0.140841	0.653933	0.82716	1.48109	291	67	14	154
0.141154	0.65618	0.82716	1.48334	292	67	14	153
0.141522	0.658427	0.82716	1.48559	293	67	14	152
0.141818	0.658427	0.814815	1.47324	293	66	15	152
0.142134	0.660674	0.814815	1.47549	294	66	15	151
0.142502	0.662921	0.814815	1.47774	295	66	15	150
0.142815	0.662921	0.802469	1.46539	295	65	16	150
0.143775	0.665169	0.802469	1.46764	296	65	16	149
0.145081	0.667416	0.802469	1.46988	297	65	16	148
0.145703	0.669663	0.802469	1.47213	298	65	16	147
0.14604	0.67191	0.802469	1.47438	299	65	16	146
0.14629	0.67191	0.790123	1.46203	299	64	17	146
0.146468	0.674157	0.790123	1.46428	300	64	17	145
0.146785	0.676404	0.790123	1.46653	301	64	17	144
0.14781	0.678652	0.790123	1.46878	302	64	17	143
0.148603	0.680899	0.790123	1.47102	303	64	17	142
0.149096	0.680899	0.777778	1.45868	303	63	18	142
0.149789	0.683146	0.777778	1.46092	304	63	18	141
0.150106	0.685393	0.777778	1.46317	305	63	18	140
0.150568	0.68764	0.777778	1.46542	306	63	18	139
0.151447	0.689888	0.777778	1.46767	307	63	18	138
0.152286	0.689888	0.765432	1.45532	307	62	19	138
0.153537	0.692135	0.765432	1.45757	308	62	19	137
0.154658	0.694382	0.765432	1.45981	309	62	19	136
0.155139	0.694382	0.753086	1.44747	309	61	20	136
0.156575	0.696629	0.753086	1.44972	310	61	20	135
0.157812	0.698876	0.753086	1.45196	311	61	20	134
0.15851	0.701124	0.753086	1.45421	312	61	20	133
0.159333	0.701124	0.740741	1.44186	312	60	21	133
0.159683	0.703371	0.740741	1.44411	313	60	21	132
0.15993	0.705618	0.740741	1.44636	314	60	21	131
0.160241	0.707865	0.740741	1.44861	315	60	21	130
0.160662	0.707865	0.728395	1.43626	315	59	22	130
0.161151	0.710112	0.728395	1.43851	316	59	22	129
0.16183	0.710112	0.716049	1.42616	316	58	23	129
0.162705	0.71236	0.716049	1.42841	317	58	23	128
0.164008	0.714607	0.716049	1.43066	318	58	23	127
0.165389	0.716854	0.716049	1.4329	319	58	23	126
0.166162	0.719101	0.716049	1.43515	320	58	23	125
0.166377	0.721348	0.716049	1.4374	321	58	23	124
0.166564	0.723596	0.716049	1.43964	322	58	23	123
0.166832	0.725843	0.716049	1.44189	323	58	23	122
0.167416	0.72809	0.716049	1.44414	324	58	23	121
0.169501	0.730337	0.716049	1.44639	325	58	23	120
0.171189	0.732584	0.716049	1.44863	326	58	23	119
0.171297	0.734831	0.716049	1.45088	327	58	23	118
0.171856	0.737079	0.716049	1.45313	328	58	23	117
0.173138	0.739326	0.716049	1.45538	329	58	23	116
0.173999	0.741573	0.716049	1.45762	330	58	23	115
0.174466	0.741573	0.703704	1.44528	330	57	24	115
0.17504	0.74382	0.703704	1.44752	331	57	24	114
0.17546	0.746067	0.703704	1.44977	332	57	24	113
0.175732	0.748315	0.703704	1.45202	333	57	24	112
0.175803	0.748315	0.691358	1.43967	333	56	25	112
0.176106	0.748315	0.679012	1.42733	333	55	26	112
0.176416	0.750562	0.679012	1.42957	334	55	26	111
0.176997	0.752809	0.679012	1.43182	335	55	26	110
0.178757	0.755056	0.679012	1.43407	336	55	26	109
0.180751	0.757303	0.679012	1.43632	337	55	26	108
0.181801	0.759551	0.679012	1.43856	338	55	26	107
0.182178	0.761798	0.679012	1.44081	339	55	26	106
0.182468	0.764045	0.679012	1.44306	340	55	26	105
0.182923	0.766292	0.679012	1.4453	341	55	26	104
0.183267	0.768539	0.679012	1.44755	342	55	26	103
0.183831	0.770787	0.679012	1.4498	343	55	26	102
0.1848	0.773034	0.679012	1.45205	344	55	26	101
0.186077	0.775281	0.679012	1.45429	345	55	26	100
0.186942	0.777528	0.679012	1.45654	346	55	26	99
0.188421	0.779775	0.679012	1.45879	347	55	26	98
0.190126	0.779775	0.666667	1.44644	347	54	27	98
0.190713	0.782022	0.666667	1.44869	348	54	27	97
0.192252	0.782022	0.654321	1.43634	348	53	28	97
0.193575	0.782022	0.641975	1.424	348	52	29	97
0.194024	0.78427	0.641975	1.42624	349	52	29	96
0.194679	0.786517	0.641975	1.42849	350	52	29	95
0.195547	0.788764	0.641975	1.43074	351	52	29	94
0.196177	0.788764	0.62963	1.41839	351	51	30	94
0.196322	0.788764	0.617284	1.40605	351	50	31	94
0.196857	0.791011	0.617284	1.4083	352	50	31	93
0.198564	0.793258	0.617284	1.41054	353	50	31	92
0.200081	0.795506	0.617284	1.41279	354	50	31	91
0.200784	0.797753	0.617284	1.41504	355	50	31	90
0.201402	0.8	0.617284	1.41728	356	50	31	89
0.201673	0.802247	0.617284	1.41953	357	50	31	88
0.202006	0.802247	0.604938	1.40719	357	49	32	88
0.202692	0.802247	0.592593	1.39484	357	48	33	88
0.204156	0.804494	0.592593	1.39709	358	48	33	87
0.205283	0.806742	0.592593	1.39933	359	48	33	86
0.205874	0.806742	0.580247	1.38699	359	47	34	86
0.206711	0.808989	0.580247	1.38924	360	47	34	85
0.207688	0.811236	0.580247	1.39148	361	47	34	84
0.208769	0.813483	0.580247	1.39373	362	47	34	83
0.210813	0.81573	0.580247	1.39598	363	47	34	82
0.21257	0.817978	0.580247	1.39822	364	47	34	81
0.212839	0.820225	0.580247	1.40047	365	47	34	80
0.214397	0.820225	0.567901	1.38813	365	46	35	80
0.216523	0.820225	0.555556	1.37578	365	45	36	80
0.217562	0.822472	0.555556	1.37803	366	45	36	79
0.218613	0.824719	0.555556	1.38027	367	45	36	78
0.219582	0.824719	0.54321	1.36793	367	44	37	78
0.221595	0.824719	0.530864	1.35558	367	43	38	78
0.224677	0.826966	0.530864	1.35783	368	43	38	77
0.227227	0.829213	0.530864	1.36008	369	43	38	76
0.228649	0.829213	0.518519	1.34773	369	42	39	76
0.229034	0.831461	0.518519	1.34998	370	42	39	75
0.229227	0.831461	0.506173	1.33763	370	41	40	75
0.229759	0.833708	0.506173	1.33988	371	41	40	74
0.23049	0.835955	0.506173	1.34213	372	41	40	73
0.230852	0.838202	0.506173	1.34438	373	41	40	72
0.232023	0.840449	0.506173	1.34662	374	41	40	71
0.233357	0.842697	0.506173	1.34887	375	41	40	70
0.2343	0.844944	0.506173	1.35112	376	41	40	69
0.235091	0.847191	0.506173	1.35336	377	41	40	68
0.235355	0.847191	0.493827	1.34102	377	40	41	68
0.235546	0.847191	0.481481	1.32867	377	39	42	68
0.235695	0.847191	0.469136	1.31633	377	38	43	68
0.237149	0.849438	0.469136	1.31857	378	38	43	67
0.238568	0.849438	0.45679	1.30623	378	37	44	67
0.238745	0.851685	0.45679	1.30848	379	37	44	66
0.239261	0.853933	0.45679	1.31072	380	37	44	65
0.241155	0.85618	0.45679	1.31297	381	37	44	64
0.243285	0.858427	0.45679	1.31522	382	37	44	63
0.244967	0.860674	0.45679	1.31746	383	37	44	62
0.246096	0.860674	0.444444	1.30512	383	36	45	62
0.246316	0.860674	0.432099	1.29277	383	35	46	62
0.246466	0.862921	0.432099	1.29502	384	35	46	61
0.246792	0.862921	0.419753	1.28267	384	34	47	61
0.247826	0.865169	0.419753	1.28492	385	34	47	60
0.250032	0.867416	0.419753	1.28717	386	34	47	59
0.251595	0.867416	0.407407	1.27482	386	33	48	59
0.253072	0.869663	0.407407	1.27707	387	33	48	58
0.254558	0.87191	0.407407	1.27932	388	33	48	57
0.25618	0.874157	0.407407	1.28156	389	33	48	56
0.258356	0.876404	0.407407	1.28381	390	33	48	55
0.26101	0.878652	0.407407	1.28606	391	33	48	54
0.263508	0.878652	0.395062	1.27371	391	32	49	54
0.264334	0.880899	0.395062	1.27596	392	32	49	53
0.264987	0.883146	0.395062	1.27821	393	32	49	52
0.266355	0.883146	0.382716	1.26586	393	31	50	52
0.268369	0.883146	0.37037	1.25352	393	30	51	52
0.271728	0.885393	0.37037	1.25576	394	30	51	51
0.27476	0.88764	0.37037	1.25801	395	30	51	50
0.275421	0.88764	0.358025	1.24567	395	29	52	50
0.275879	0.889888	0.358025	1.24791	396	29	52	49
0.277024	0.892135	0.358025	1.25016	397	29	52	48
0.279082	0.894382	0.358025	1.25241	398	29	52	47
0.280941	0.896629	0.358025	1.25465	399	29	52	46
0.284225	0.896629	0.345679	1.24231	399	28	53	46
0.287688	0.896629	0.333333	1.22996	399	27	54	46
0.288693	0.896629	0.320988	1.21762	399	26	55	46
0.289873	0.898876	0.320988	1.21986	400	26	55	45
0.290989	0.901124	0.320988	1.22211	401	26	55	44
0.292573	0.903371	0.320988	1.22436	402	26	55	43
0.29481	0.905618	0.320988	1.22661	403	26	55	42
0.29608	0.907865	0.320988	1.22885	404	26	55	41
0.298312	0.910112	0.320988	1.2311	405	26	55	40
0.300536	0.910112	0.308642	1.21875	405	25	56	40
0.301304	0.910112	0.296296	1.20641	405	24	57	40
0.301907	0.910112	0.283951	1.19406	405	23	58	40
0.302164	0.91236	0.283951	1.19631	406	23	58	39
0.305426	0.914607	0.283951	1.19856	407	23	58	38
0.309092	0.916854	0.283951	1.2008	408	23	58	37
0.309939	0.916854	0.271605	1.18846	408	22	59	37
0.310838	0.919101	0.271605	1.19071	409	22	59	36
0.312009	0.919101	0.259259	1.17836	409	21	60	36
0.313153	0.921348	0.259259	1.18061	410	21	60	35
0.313922	0.923596	0.259259	1.18285	411	21	60	34
0.315295	0.925843	0.259259	1.1851	412	21	60	33
0.317629	0.92809	0.259259	1.18735	413	21	60	32
0.318888	0.92809	0.246914	1.175	413	20	61	32
0.319186	0.92809	0.234568	1.16266	413	19	62	32
0.319924	0.930337	0.234568	1.1649	414	19	62	31
0.321769	0.932584	0.234568	1.16715	415	19	62	30
0.325022	0.934831	0.234568	1.1694	416	19	62	29
0.330592	0.937079	0.234568	1.17165	417	19	62	28
0.336214	0.939326	0.234568	1.17389	418	19	62	27
0.339683	0.941573	0.234568	1.17614	419	19	62	26
0.344161	0.941573	0.222222	1.1638	419	18	63	26
0.350047	0.94382	0.222222	1.16604	420	18	63	25
0.353384	0.946067	0.222222	1.16829	421	18	63	24
0.355358	0.946067	0.209877	1.15594	421	17	64	24
0.358188	0.948315	0.209877	1.15819	422	17	64	23
0.362223	0.950562	0.209877	1.16044	423	17	64	22
0.371134	0.950562	0.197531	1.14809	423	16	65	22
0.378075	0.952809	0.197531	1.15034	424	16	65	21
0.37906	0.952809	0.185185	1.13799	424	15	66	21
0.379948	0.955056	0.185185	1.14024	425	15	66	20
0.383687	0.957303	0.185185	1.14249	426	15	66	19
0.387683	0.959551	0.185185	1.14474	427	15	66	18
0.391216	0.961798	0.185185	1.14698	428	15	66	17
0.395454	0.964045	0.185185	1.14923	429	15	66	16
0.398284	0.964045	0.17284	1.13688	429	14	67	16
0.402285	0.964045	0.160494	1.12454	429	13	68	16
0.408744	0.966292	0.160494	1.12679	430	13	68	15
0.414039	0.968539	0.160494	1.12903	431	13	68	14
0.415801	0.968539	0.148148	1.11669	431	12	69	14
0.419528	0.970787	0.148148	1.11893	432	12	69	13
0.423352	0.973034	0.148148	1.12118	433	12	69	12
0.425985	0.973034	0.135802	1.10884	433	11	70	12
0.439185	0.975281	0.135802	1.11108	434	11	70	11
0.451196	0.977528	0.135802	1.11333	435	11	70	10
0.459637	0.979775	0.135802	1.11558	436	11	70	9
0.467735	0.982022	0.135802	1.11782	437	11	70	8
0.469343	0.98427	0.135802	1.12007	438	11	70	7
0.47182	0.98427	0.123457	1.10773	438	10	71	7
0.478941	0.986517	0.123457	1.10997	439	10	71	6
0.502904	0.986517	0.111111	1.09763	439	9	72	6
0.52165	0.986517	0.0987654	1.08528	439	8	73	6
0.522867	0.988764	0.0987654	1.08753	440	8	73	5
0.526149	0.988764	0.0864198	1.07518	440	7	74	5
0.531108	0.991011	0.0864198	1.07743	441	7	74	4
0.537505	0.991011	0.0740741	1.06509	441	6	75	4
0.545099	0.991011	0.0617284	1.05274	441	5	76	4
0.562455	0.993258	0.0617284	1.05499	442	5	76	3
0.578742	0.995506	0.0617284	1.05723	443	5	76	2
0.606193	0.995506	0.0493827	1.04489	443	4	77	2
0.636794	0.997753	0.0493827	1.04714	444	4	77	1
0.680311	0.997753	0.037037	1.03479	444	3	78	1
0.731249	0.997753	0.0246914	1.02244	444	2	79	1
0.757717	1	0.0246914	1.02469	445	2	79	0
0.811183	1	0.0123457	1.01235	445	1	80	0
Inf	1	0	1	445	0	81	0

## Sheet: BMI
threshold	specificity	sensitivity	youden	tn	tp	fn	fp
-Inf	0	1	1	0	81	0	445
0.0449519	0.00224719	1	1.00225	1	81	0	444
0.0496356	0.00449438	1	1.00449	2	81	0	443
0.0515071	0.00674157	1	1.00674	3	81	0	442
0.0531163	0.00898876	1	1.00899	4	81	0	441
0.0543065	0.011236	1	1.01124	5	81	0	440
0.0551332	0.0134831	1	1.01348	6	81	0	439
0.0556839	0.0157303	1	1.01573	7	81	0	438
0.0566023	0.0179775	1	1.01798	8	81	0	437
0.0575395	0.0202247	1	1.02022	9	81	0	436
0.0584716	0.0224719	1	1.02247	10	81	0	435
0.0591014	0.0247191	1	1.02472	11	81	0	434
0.0595977	0.0269663	1	1.02697	12	81	0	433
0.0600702	0.0292135	1	1.02921	13	81	0	432
0.0601412	0.0314607	1	1.03146	14	81	0	431
0.0602859	0.0337079	1	1.03371	15	81	0	430
0.0608736	0.0359551	1	1.03596	16	81	0	429
0.0614375	0.0359551	0.987654	1.02361	16	80	1	429
0.0619861	0.0382022	0.987654	1.02586	17	80	1	428
0.0625063	0.0404494	0.987654	1.0281	18	80	1	427
0.0625742	0.0426966	0.987654	1.03035	19	80	1	426
0.0626382	0.0449438	0.987654	1.0326	20	80	1	425
0.0629847	0.047191	0.987654	1.03485	21	80	1	424
0.0633016	0.0494382	0.987654	1.03709	22	80	1	423
0.0633222	0.0516854	0.987654	1.03934	23	80	1	422
0.0633777	0.0539326	0.987654	1.04159	24	80	1	421
0.0635317	0.0561798	0.987654	1.04383	25	80	1	420
0.0638979	0.058427	0.987654	1.04608	26	80	1	419
0.0647638	0.0606742	0.987654	1.04833	27	80	1	418
0.0654268	0.0629213	0.987654	1.05058	28	80	1	417
0.0654777	0.0651685	0.987654	1.05282	29	80	1	416
0.0658569	0.0674157	0.987654	1.05507	30	80	1	415
0.0665905	0.0696629	0.987654	1.05732	31	80	1	414
0.0670504	0.0719101	0.987654	1.05956	32	80	1	413
0.0671532	0.0741573	0.987654	1.06181	33	80	1	412
0.0672314	0.0764045	0.987654	1.06406	34	80	1	411
0.0674986	0.0786517	0.987654	1.06631	35	80	1	410
0.0678757	0.0786517	0.975309	1.05396	35	79	2	410
0.0685172	0.0808989	0.975309	1.05621	36	79	2	409
0.0690481	0.0831461	0.975309	1.05845	37	79	2	408
0.069391	0.0853933	0.975309	1.0607	38	79	2	407
0.0700979	0.0876404	0.975309	1.06295	39	79	2	406
0.0707133	0.0898876	0.975309	1.0652	40	79	2	405
0.0712506	0.0921348	0.975309	1.06744	41	79	2	404
0.0716745	0.094382	0.975309	1.06969	42	79	2	403
0.0718732	0.0966292	0.975309	1.07194	43	79	2	402
0.07205	0.0988764	0.975309	1.07419	44	79	2	401
0.072454	0.101124	0.975309	1.07643	45	79	2	400
0.0729371	0.101124	0.962963	1.06409	45	78	3	400
0.0730677	0.103371	0.962963	1.06633	46	78	3	399
0.0734876	0.105618	0.962963	1.06858	47	78	3	398
0.0740974	0.107865	0.962963	1.07083	48	78	3	397
0.0747239	0.11236	0.962963	1.07532	50	78	3	395
0.0754051	0.114607	0.962963	1.07757	51	78	3	394
0.0757851	0.116854	0.962963	1.07982	52	78	3	393
0.0760017	0.119101	0.962963	1.08206	53	78	3	392
0.0761119	0.121348	0.962963	1.08431	54	78	3	391
0.0763214	0.123596	0.962963	1.08656	55	78	3	390
0.0766402	0.123596	0.950617	1.07421	55	77	4	390
0.076823	0.125843	0.950617	1.07646	56	77	4	389
0.0769499	0.12809	0.950617	1.07871	57	77	4	388
0.0770747	0.130337	0.950617	1.08095	58	77	4	387
0.0772572	0.132584	0.950617	1.0832	59	77	4	386
0.0774647	0.134831	0.950617	1.08545	60	77	4	385
0.0776159	0.137079	0.950617	1.0877	61	77	4	384
0.0777155	0.139326	0.950617	1.08994	62	77	4	383
0.0777574	0.141573	0.950617	1.09219	63	77	4	382
0.0778144	0.14382	0.950617	1.09444	64	77	4	381
0.0780758	0.146067	0.950617	1.09668	65	77	4	380
0.0784749	0.148315	0.950617	1.09893	66	77	4	379
0.0786656	0.150562	0.950617	1.10118	67	77	4	378
0.0788833	0.152809	0.950617	1.10343	68	77	4	377
0.0791976	0.155056	0.950617	1.10567	69	77	4	376
0.0797374	0.157303	0.950617	1.10792	70	77	4	375
0.080236	0.159551	0.950617	1.11017	71	77	4	374
0.0804947	0.161798	0.950617	1.11242	72	77	4	373
0.0807256	0.164045	0.950617	1.11466	73	77	4	372
0.0808207	0.166292	0.950617	1.11691	74	77	4	371
0.0808916	0.168539	0.950617	1.11916	75	77	4	370
0.0811039	0.170787	0.950617	1.1214	76	77	4	369
0.0813692	0.173034	0.950617	1.12365	77	77	4	368
0.0819276	0.175281	0.950617	1.1259	78	77	4	367
0.0824952	0.177528	0.950617	1.12815	79	77	4	366
0.0830784	0.179775	0.950617	1.13039	80	77	4	365
0.0836267	0.182022	0.950617	1.13264	81	77	4	364
0.0837314	0.18427	0.950617	1.13489	82	77	4	363
0.0838013	0.186517	0.950617	1.13713	83	77	4	362
0.0839736	0.188764	0.950617	1.13938	84	77	4	361
0.0841625	0.191011	0.950617	1.14163	85	77	4	360
0.0842371	0.193258	0.950617	1.14388	86	77	4	359
0.0847534	0.195506	0.950617	1.14612	87	77	4	358
0.085277	0.197753	0.950617	1.14837	88	77	4	357
0.0855538	0.2	0.950617	1.15062	89	77	4	356
0.0858862	0.202247	0.950617	1.15286	90	77	4	355
0.0862106	0.204494	0.950617	1.15511	91	77	4	354
0.0866058	0.206742	0.950617	1.15736	92	77	4	353
0.0869962	0.208989	0.950617	1.15961	93	77	4	352
0.0872465	0.211236	0.950617	1.16185	94	77	4	351
0.0875571	0.213483	0.950617	1.1641	95	77	4	350
0.0879321	0.21573	0.950617	1.16635	96	77	4	349
0.0880763	0.217978	0.950617	1.16859	97	77	4	348
0.0881526	0.220225	0.950617	1.17084	98	77	4	347
0.0883622	0.222472	0.950617	1.17309	99	77	4	346
0.0886378	0.224719	0.950617	1.17534	100	77	4	345
0.0887481	0.226966	0.950617	1.17758	101	77	4	344
0.0887673	0.229213	0.950617	1.17983	102	77	4	343
0.0888663	0.231461	0.950617	1.18208	103	77	4	342
0.0891926	0.233708	0.950617	1.18433	104	77	4	341
0.0894494	0.235955	0.950617	1.18657	105	77	4	340
0.0895317	0.238202	0.950617	1.18882	106	77	4	339
0.0896392	0.240449	0.950617	1.19107	107	77	4	338
0.0896871	0.242697	0.950617	1.19331	108	77	4	337
0.0897515	0.244944	0.950617	1.19556	109	77	4	336
0.0899458	0.247191	0.950617	1.19781	110	77	4	335
0.0901312	0.247191	0.938272	1.18546	110	76	5	335
0.0902395	0.249438	0.938272	1.18771	111	76	5	334
0.0906088	0.251685	0.938272	1.18996	112	76	5	333
0.0911853	0.253933	0.938272	1.1922	113	76	5	332
0.0914941	0.25618	0.938272	1.19445	114	76	5	331
0.0915378	0.258427	0.938272	1.1967	115	76	5	330
0.091635	0.260674	0.938272	1.19895	116	76	5	329
0.0917747	0.262921	0.938272	1.20119	117	76	5	328
0.0919158	0.265169	0.938272	1.20344	118	76	5	327
0.0922541	0.265169	0.925926	1.19109	118	75	6	327
0.092594	0.267416	0.925926	1.19334	119	75	6	326
0.092833	0.267416	0.91358	1.181	119	74	7	326
0.0930769	0.269663	0.91358	1.18324	120	74	7	325
0.0932598	0.27191	0.91358	1.18549	121	74	7	324
0.0934403	0.274157	0.91358	1.18774	122	74	7	323
0.0935773	0.276404	0.91358	1.18998	123	74	7	322
0.0936923	0.278652	0.91358	1.19223	124	74	7	321
0.0938104	0.280899	0.91358	1.19448	125	74	7	320
0.0939668	0.283146	0.91358	1.19673	126	74	7	319
0.0941545	0.285393	0.91358	1.19897	127	74	7	318
0.0945827	0.28764	0.91358	1.20122	128	74	7	317
0.0950593	0.289888	0.91358	1.20347	129	74	7	316
0.0957227	0.292135	0.91358	1.20572	130	74	7	315
0.096582	0.294382	0.91358	1.20796	131	74	7	314
0.0970409	0.296629	0.91358	1.21021	132	74	7	313
0.0972155	0.298876	0.91358	1.21246	133	74	7	312
0.0973914	0.301124	0.91358	1.2147	134	74	7	311
0.097779	0.303371	0.91358	1.21695	135	74	7	310
0.0980582	0.305618	0.91358	1.2192	136	74	7	309
0.0981677	0.305618	0.901235	1.20685	136	73	8	309
0.0982945	0.310112	0.901235	1.21135	138	73	8	307
0.0984534	0.31236	0.901235	1.21359	139	73	8	306
0.0985812	0.314607	0.901235	1.21584	140	73	8	305
0.0988843	0.316854	0.901235	1.21809	141	73	8	304
0.0993218	0.319101	0.901235	1.22034	142	73	8	303
0.0996197	0.319101	0.888889	1.20799	142	72	9	303
0.0998139	0.321348	0.888889	1.21024	143	72	9	302
0.0998838	0.323596	0.888889	1.21248	144	72	9	301
0.0999213	0.325843	0.888889	1.21473	145	72	9	300
0.100146	0.32809	0.888889	1.21698	146	72	9	299
0.100449	0.330337	0.888889	1.21923	147	72	9	298
0.100594	0.332584	0.888889	1.22147	148	72	9	297
0.10065	0.334831	0.888889	1.22372	149	72	9	296
0.100871	0.337079	0.888889	1.22597	150	72	9	295
0.101166	0.339326	0.888889	1.22821	151	72	9	294
0.101524	0.341573	0.888889	1.23046	152	72	9	293
0.10184	0.34382	0.888889	1.23271	153	72	9	292
0.101927	0.346067	0.888889	1.23496	154	72	9	291
0.102358	0.348315	0.888889	1.2372	155	72	9	290
0.102918	0.348315	0.876543	1.22486	155	71	10	290
0.103213	0.350562	0.876543	1.22711	156	71	10	289
0.103571	0.352809	0.876543	1.22935	157	71	10	288
0.103838	0.355056	0.876543	1.2316	158	71	10	287
0.103997	0.355056	0.864198	1.21925	158	70	11	287
0.104162	0.357303	0.864198	1.2215	159	70	11	286
0.1044	0.359551	0.864198	1.22375	160	70	11	285
0.104736	0.361798	0.864198	1.226	161	70	11	284
0.105426	0.364045	0.864198	1.22824	162	70	11	283
0.10599	0.366292	0.864198	1.23049	163	70	11	282
0.106299	0.366292	0.851852	1.21814	163	69	12	282
0.106677	0.368539	0.851852	1.22039	164	69	12	281
0.107021	0.370787	0.851852	1.22264	165	69	12	280
0.107883	0.373034	0.851852	1.22489	166	69	12	279
0.108507	0.375281	0.851852	1.22713	167	69	12	278
0.10862	0.377528	0.851852	1.22938	168	69	12	277
0.108772	0.379775	0.851852	1.23163	169	69	12	276
0.10906	0.379775	0.839506	1.21928	169	68	13	276
0.109382	0.382022	0.839506	1.22153	170	68	13	275
0.109526	0.38427	0.839506	1.22378	171	68	13	274
0.109609	0.38427	0.82716	1.21143	171	67	14	274
0.109696	0.386517	0.82716	1.21368	172	67	14	273
0.109743	0.388764	0.82716	1.21592	173	67	14	272
0.109795	0.388764	0.814815	1.20358	173	66	15	272
0.109876	0.391011	0.814815	1.20583	174	66	15	271
0.110015	0.393258	0.814815	1.20807	175	66	15	270
0.110316	0.395506	0.814815	1.21032	176	66	15	269
0.110658	0.397753	0.814815	1.21257	177	66	15	268
0.110943	0.4	0.814815	1.21481	178	66	15	267
0.111221	0.402247	0.814815	1.21706	179	66	15	266
0.11138	0.404494	0.814815	1.21931	180	66	15	265
0.111511	0.404494	0.802469	1.20696	180	65	16	265
0.111683	0.406742	0.802469	1.20921	181	65	16	264
0.112028	0.406742	0.790123	1.19687	181	64	17	264
0.112415	0.408989	0.790123	1.19911	182	64	17	263
0.112535	0.411236	0.790123	1.20136	183	64	17	262
0.112626	0.41573	0.790123	1.20585	185	64	17	260
0.112901	0.417978	0.790123	1.2081	186	64	17	259
0.113203	0.420225	0.790123	1.21035	187	64	17	258
0.113406	0.422472	0.790123	1.2126	188	64	17	257
0.113626	0.424719	0.790123	1.21484	189	64	17	256
0.113797	0.426966	0.790123	1.21709	190	64	17	255
0.113917	0.426966	0.777778	1.20474	190	63	18	255
0.114134	0.429213	0.777778	1.20699	191	63	18	254
0.114435	0.431461	0.777778	1.20924	192	63	18	253
0.114585	0.433708	0.777778	1.21149	193	63	18	252
0.114639	0.435955	0.777778	1.21373	194	63	18	251
0.11489	0.438202	0.777778	1.21598	195	63	18	250
0.115467	0.440449	0.777778	1.21823	196	63	18	249
0.115968	0.442697	0.777778	1.22047	197	63	18	248
0.116299	0.444944	0.777778	1.22272	198	63	18	247
0.116575	0.447191	0.777778	1.22497	199	63	18	246
0.116705	0.447191	0.765432	1.21262	199	62	19	246
0.116815	0.447191	0.753086	1.20028	199	61	20	246
0.116928	0.449438	0.753086	1.20252	200	61	20	245
0.11744	0.451685	0.753086	1.20477	201	61	20	244
0.11789	0.453933	0.753086	1.20702	202	61	20	243
0.11805	0.453933	0.740741	1.19467	202	60	21	243
0.118334	0.45618	0.740741	1.19692	203	60	21	242
0.118464	0.458427	0.740741	1.19917	204	60	21	241
0.118511	0.460674	0.740741	1.20141	205	60	21	240
0.118603	0.462921	0.740741	1.20366	206	60	21	239
0.11874	0.465169	0.740741	1.20591	207	60	21	238
0.118849	0.467416	0.740741	1.20816	208	60	21	237
0.119215	0.469663	0.740741	1.2104	209	60	21	236
0.119838	0.47191	0.740741	1.21265	210	60	21	235
0.120115	0.474157	0.740741	1.2149	211	60	21	234
0.120171	0.476404	0.740741	1.21715	212	60	21	233
0.120263	0.478652	0.740741	1.21939	213	60	21	232
0.120803	0.480899	0.740741	1.22164	214	60	21	231
0.12143	0.483146	0.740741	1.22389	215	60	21	230
0.121603	0.485393	0.740741	1.22613	216	60	21	229
0.121815	0.48764	0.740741	1.22838	217	60	21	228
0.122498	0.489888	0.740741	1.23063	218	60	21	227
0.123053	0.492135	0.740741	1.23288	219	60	21	226
0.12352	0.494382	0.740741	1.23512	220	60	21	225
0.123996	0.496629	0.740741	1.23737	221	60	21	224
0.124062	0.498876	0.740741	1.23962	222	60	21	223
0.124121	0.501124	0.740741	1.24186	223	60	21	222
0.124181	0.503371	0.740741	1.24411	224	60	21	221
0.12434	0.505618	0.740741	1.24636	225	60	21	220
0.124525	0.507865	0.740741	1.24861	226	60	21	219
0.124592	0.510112	0.740741	1.25085	227	60	21	218
0.12489	0.51236	0.740741	1.2531	228	60	21	217
0.12519	0.514607	0.740741	1.25535	229	60	21	216
0.125287	0.516854	0.740741	1.25759	230	60	21	215
0.125373	0.519101	0.740741	1.25984	231	60	21	214
0.125485	0.521348	0.740741	1.26209	232	60	21	213
0.126012	0.523596	0.740741	1.26434	233	60	21	212
0.126618	0.525843	0.740741	1.26658	234	60	21	211
0.126921	0.52809	0.740741	1.26883	235	60	21	210
0.127061	0.530337	0.740741	1.27108	236	60	21	209
0.127492	0.530337	0.728395	1.25873	236	59	22	209
0.128083	0.532584	0.728395	1.26098	237	59	22	208
0.128309	0.534831	0.728395	1.26323	238	59	22	207
0.128381	0.534831	0.716049	1.25088	238	58	23	207
0.128949	0.537079	0.716049	1.25313	239	58	23	206
0.129526	0.537079	0.703704	1.24078	239	57	24	206
0.129601	0.539326	0.703704	1.24303	240	57	24	205
0.129809	0.541573	0.703704	1.24528	241	57	24	204
0.129978	0.54382	0.703704	1.24752	242	57	24	203
0.130227	0.54382	0.691358	1.23518	242	56	25	203
0.130701	0.546067	0.691358	1.23743	243	56	25	202
0.130985	0.548315	0.691358	1.23967	244	56	25	201
0.131066	0.550562	0.691358	1.24192	245	56	25	200
0.131114	0.552809	0.691358	1.24417	246	56	25	199
0.13134	0.555056	0.691358	1.24641	247	56	25	198
0.131797	0.557303	0.691358	1.24866	248	56	25	197
0.132663	0.557303	0.679012	1.23632	248	55	26	197
0.133454	0.559551	0.679012	1.23856	249	55	26	196
0.133765	0.561798	0.679012	1.24081	250	55	26	195
0.1341	0.564045	0.679012	1.24306	251	55	26	194
0.134335	0.566292	0.679012	1.2453	252	55	26	193
0.134498	0.568539	0.679012	1.24755	253	55	26	192
0.134929	0.570787	0.679012	1.2498	254	55	26	191
0.135237	0.573034	0.679012	1.25205	255	55	26	190
0.135264	0.575281	0.679012	1.25429	256	55	26	189
0.135704	0.577528	0.679012	1.25654	257	55	26	188
0.13613	0.579775	0.679012	1.25879	258	55	26	187
0.136814	0.582022	0.679012	1.26103	259	55	26	186
0.13752	0.582022	0.666667	1.24869	259	54	27	186
0.137579	0.58427	0.666667	1.25094	260	54	27	185
0.137836	0.586517	0.666667	1.25318	261	54	27	184
0.138419	0.588764	0.666667	1.25543	262	54	27	183
0.138827	0.591011	0.666667	1.25768	263	54	27	182
0.138944	0.591011	0.654321	1.24533	263	53	28	182
0.139302	0.593258	0.654321	1.24758	264	53	28	181
0.140057	0.595506	0.654321	1.24983	265	53	28	180
0.140534	0.597753	0.654321	1.25207	266	53	28	179
0.140736	0.6	0.654321	1.25432	267	53	28	178
0.140936	0.602247	0.654321	1.25657	268	53	28	177
0.141088	0.604494	0.654321	1.25882	269	53	28	176
0.141481	0.606742	0.654321	1.26106	270	53	28	175
0.141942	0.608989	0.654321	1.26331	271	53	28	174
0.142371	0.611236	0.654321	1.26556	272	53	28	173
0.14269	0.61573	0.654321	1.27005	274	53	28	171
0.142816	0.617978	0.654321	1.2723	275	53	28	170
0.143283	0.620225	0.654321	1.27455	276	53	28	169
0.144175	0.622472	0.654321	1.27679	277	53	28	168
0.144863	0.624719	0.654321	1.27904	278	53	28	167
0.145175	0.626966	0.654321	1.28129	279	53	28	166
0.145966	0.626966	0.641975	1.26894	279	52	29	166
0.146818	0.626966	0.62963	1.2566	279	51	30	166
0.147081	0.629213	0.62963	1.25884	280	51	30	165
0.147385	0.631461	0.62963	1.26109	281	51	30	164
0.147598	0.633708	0.62963	1.26334	282	51	30	163
0.147899	0.635955	0.62963	1.26558	283	51	30	162
0.148416	0.638202	0.62963	1.26783	284	51	30	161
0.148779	0.640449	0.62963	1.27008	285	51	30	160
0.149777	0.642697	0.62963	1.27233	286	51	30	159
0.150999	0.644944	0.62963	1.27457	287	51	30	158
0.151347	0.647191	0.62963	1.27682	288	51	30	157
0.151601	0.649438	0.62963	1.27907	289	51	30	156
0.152102	0.651685	0.62963	1.28132	290	51	30	155
0.152651	0.653933	0.62963	1.28356	291	51	30	154
0.153025	0.65618	0.62963	1.28581	292	51	30	153
0.153162	0.658427	0.62963	1.28806	293	51	30	152
0.153225	0.660674	0.62963	1.2903	294	51	30	151
0.15331	0.662921	0.62963	1.29255	295	51	30	150
0.153459	0.665169	0.62963	1.2948	296	51	30	149
0.153786	0.667416	0.62963	1.29705	297	51	30	148
0.154495	0.669663	0.62963	1.29929	298	51	30	147
0.155107	0.67191	0.62963	1.30154	299	51	30	146
0.15641	0.674157	0.62963	1.30379	300	51	30	145
0.157693	0.674157	0.617284	1.29144	300	50	31	145
0.158148	0.674157	0.604938	1.2791	300	49	32	145
0.158554	0.676404	0.604938	1.28134	301	49	32	144
0.158907	0.678652	0.604938	1.28359	302	49	32	143
0.159178	0.680899	0.604938	1.28584	303	49	32	142
0.159374	0.683146	0.604938	1.28808	304	49	32	141
0.159571	0.685393	0.604938	1.29033	305	49	32	140
0.159591	0.68764	0.604938	1.29258	306	49	32	139
0.159899	0.689888	0.604938	1.29483	307	49	32	138
0.160207	0.692135	0.604938	1.29707	308	49	32	137
0.160268	0.694382	0.604938	1.29932	309	49	32	136
0.160499	0.696629	0.604938	1.30157	310	49	32	135
0.160899	0.698876	0.604938	1.30381	311	49	32	134
0.161242	0.703371	0.604938	1.30831	313	49	32	132
0.161629	0.705618	0.604938	1.31056	314	49	32	131
0.161947	0.705618	0.592593	1.29821	314	48	33	131
0.162122	0.707865	0.592593	1.30046	315	48	33	130
0.16233	0.710112	0.592593	1.3027	316	48	33	129
0.162517	0.71236	0.592593	1.30495	317	48	33	128
0.162793	0.714607	0.592593	1.3072	318	48	33	127
0.163093	0.716854	0.592593	1.30945	319	48	33	126
0.16322	0.719101	0.592593	1.31169	320	48	33	125
0.163484	0.721348	0.592593	1.31394	321	48	33	124
0.163818	0.723596	0.592593	1.31619	322	48	33	123
0.163941	0.725843	0.592593	1.31844	323	48	33	122
0.164088	0.72809	0.592593	1.32068	324	48	33	121
0.164266	0.730337	0.592593	1.32293	325	48	33	120
0.164375	0.734831	0.592593	1.32742	327	48	33	118
0.164462	0.737079	0.592593	1.32967	328	48	33	117
0.164642	0.739326	0.592593	1.33192	329	48	33	116
0.165139	0.741573	0.592593	1.33417	330	48	33	115
0.165655	0.741573	0.580247	1.32182	330	47	34	115
0.166046	0.74382	0.580247	1.32407	331	47	34	114
0.166311	0.74382	0.567901	1.31172	331	46	35	114
0.166727	0.746067	0.567901	1.31397	332	46	35	113
0.167274	0.748315	0.567901	1.31622	333	46	35	112
0.167596	0.748315	0.555556	1.30387	333	45	36	112
0.168068	0.750562	0.555556	1.30612	334	45	36	111
0.169559	0.750562	0.54321	1.29377	334	44	37	111
0.171126	0.752809	0.54321	1.29602	335	44	37	110
0.171735	0.755056	0.54321	1.29827	336	44	37	109
0.171989	0.757303	0.54321	1.30051	337	44	37	108
0.172044	0.759551	0.54321	1.30276	338	44	37	107
0.172235	0.761798	0.54321	1.30501	339	44	37	106
0.172508	0.764045	0.54321	1.30725	340	44	37	105
0.173123	0.764045	0.530864	1.29491	340	43	38	105
0.173822	0.766292	0.530864	1.29716	341	43	38	104
0.17467	0.770787	0.530864	1.30165	343	43	38	102
0.175605	0.773034	0.530864	1.3039	344	43	38	101
0.176047	0.775281	0.530864	1.30615	345	43	38	100
0.176216	0.777528	0.530864	1.30839	346	43	38	99
0.176278	0.779775	0.530864	1.31064	347	43	38	98
0.176851	0.782022	0.530864	1.31289	348	43	38	97
0.177736	0.782022	0.518519	1.30054	348	42	39	97
0.17841	0.78427	0.518519	1.30279	349	42	39	96
0.178881	0.786517	0.518519	1.30504	350	42	39	95
0.179278	0.786517	0.506173	1.29269	350	41	40	95
0.179861	0.788764	0.506173	1.29494	351	41	40	94
0.180216	0.791011	0.506173	1.29718	352	41	40	93
0.180452	0.793258	0.506173	1.29943	353	41	40	92
0.181556	0.795506	0.506173	1.30168	354	41	40	91
0.183289	0.797753	0.506173	1.30393	355	41	40	90
0.184232	0.797753	0.493827	1.29158	355	40	41	90
0.184498	0.797753	0.481481	1.27923	355	39	42	90
0.184713	0.8	0.481481	1.28148	356	39	42	89
0.185215	0.8	0.469136	1.26914	356	38	43	89
0.185989	0.8	0.45679	1.25679	356	37	44	89
0.186384	0.802247	0.45679	1.25904	357	37	44	88
0.186485	0.804494	0.45679	1.26128	358	37	44	87
0.186903	0.806742	0.45679	1.26353	359	37	44	86
0.187541	0.808989	0.45679	1.26578	360	37	44	85
0.188628	0.811236	0.45679	1.26803	361	37	44	84
0.189625	0.811236	0.444444	1.25568	361	36	45	84
0.190402	0.813483	0.444444	1.25793	362	36	45	83
0.191251	0.81573	0.444444	1.26017	363	36	45	82
0.19198	0.81573	0.432099	1.24783	363	35	46	82
0.192517	0.81573	0.419753	1.23548	363	34	47	82
0.192685	0.817978	0.419753	1.23773	364	34	47	81
0.19329	0.820225	0.419753	1.23998	365	34	47	80
0.193883	0.822472	0.407407	1.22988	366	33	48	79
0.19417	0.824719	0.407407	1.23213	367	33	48	78
0.194347	0.826966	0.407407	1.23437	368	33	48	77
0.194557	0.829213	0.407407	1.23662	369	33	48	76
0.194831	0.831461	0.407407	1.23887	370	33	48	75
0.195757	0.833708	0.407407	1.24112	371	33	48	74
0.196803	0.833708	0.395062	1.22877	371	32	49	74
0.19736	0.835955	0.395062	1.23102	372	32	49	73
0.198489	0.835955	0.382716	1.21867	372	31	50	73
0.199464	0.838202	0.382716	1.22092	373	31	50	72
0.199679	0.840449	0.382716	1.22317	374	31	50	71
0.199953	0.842697	0.382716	1.22541	375	31	50	70
0.2004	0.844944	0.382716	1.22766	376	31	50	69
0.200645	0.844944	0.37037	1.21531	376	30	51	69
0.200709	0.847191	0.37037	1.21756	377	30	51	68
0.201003	0.849438	0.37037	1.21981	378	30	51	67
0.201326	0.851685	0.37037	1.22206	379	30	51	66
0.202295	0.853933	0.37037	1.2243	380	30	51	65
0.203371	0.85618	0.37037	1.22655	381	30	51	64
0.204337	0.858427	0.37037	1.2288	382	30	51	63
0.205367	0.858427	0.358025	1.21645	382	29	52	63
0.20578	0.860674	0.358025	1.2187	383	29	52	62
0.2063	0.862921	0.358025	1.22095	384	29	52	61
0.206939	0.865169	0.345679	1.21085	385	28	53	60
0.207482	0.865169	0.333333	1.1985	385	27	54	60
0.20784	0.865169	0.320988	1.18616	385	26	55	60
0.208	0.867416	0.320988	1.1884	386	26	55	59
0.208597	0.869663	0.320988	1.19065	387	26	55	58
0.209586	0.87191	0.320988	1.1929	388	26	55	57
0.210268	0.874157	0.320988	1.19514	389	26	55	56
0.211063	0.874157	0.308642	1.1828	389	25	56	56
0.21163	0.876404	0.308642	1.18505	390	25	56	55
0.21234	0.878652	0.308642	1.18729	391	25	56	54
0.213096	0.880899	0.308642	1.18954	392	25	56	53
0.213848	0.883146	0.308642	1.19179	393	25	56	52
0.215018	0.885393	0.308642	1.19404	394	25	56	51
0.217396	0.88764	0.308642	1.19628	395	25	56	50
0.219932	0.889888	0.308642	1.19853	396	25	56	49
0.221315	0.889888	0.296296	1.18618	396	24	57	49
0.222648	0.892135	0.296296	1.18843	397	24	57	48
0.223331	0.892135	0.283951	1.17609	397	23	58	48
0.223899	0.894382	0.283951	1.17833	398	23	58	47
0.22854	0.894382	0.271605	1.16599	398	22	59	47
0.232948	0.896629	0.271605	1.16823	399	22	59	46
0.233893	0.898876	0.271605	1.17048	400	22	59	45
0.235723	0.898876	0.259259	1.15814	400	21	60	45
0.237012	0.901124	0.259259	1.16038	401	21	60	44
0.237479	0.903371	0.259259	1.16263	402	21	60	43
0.237851	0.905618	0.259259	1.16488	403	21	60	42
0.23983	0.907865	0.259259	1.16712	404	21	60	41
0.242304	0.910112	0.259259	1.16937	405	21	60	40
0.243237	0.910112	0.246914	1.15703	405	20	61	40
0.243703	0.910112	0.234568	1.14468	405	19	62	40
0.244645	0.91236	0.234568	1.14693	406	19	62	39
0.246861	0.914607	0.234568	1.14917	407	19	62	38
0.248498	0.916854	0.234568	1.15142	408	19	62	37
0.249018	0.919101	0.234568	1.15367	409	19	62	36
0.249843	0.919101	0.222222	1.14132	409	18	63	36
0.250503	0.921348	0.222222	1.14357	410	18	63	35
0.251856	0.923596	0.222222	1.14582	411	18	63	34
0.253578	0.925843	0.222222	1.14806	412	18	63	33
0.254241	0.92809	0.222222	1.15031	413	18	63	32
0.256156	0.930337	0.222222	1.15256	414	18	63	31
0.258239	0.932584	0.222222	1.15481	415	18	63	30
0.259075	0.934831	0.222222	1.15705	416	18	63	29
0.261685	0.934831	0.209877	1.14471	416	17	64	29
0.266745	0.937079	0.209877	1.14696	417	17	64	28
0.270569	0.937079	0.197531	1.13461	417	16	65	28
0.271935	0.939326	0.197531	1.13686	418	16	65	27
0.272388	0.941573	0.197531	1.1391	419	16	65	26
0.273516	0.941573	0.185185	1.12676	419	15	66	26
0.274851	0.941573	0.17284	1.11441	419	14	67	26
0.275229	0.94382	0.17284	1.11666	420	14	67	25
0.279727	0.946067	0.17284	1.11891	421	14	67	24
0.285177	0.948315	0.17284	1.12115	422	14	67	23
0.286473	0.948315	0.160494	1.10881	422	13	68	23
0.287206	0.950562	0.160494	1.11106	423	13	68	22
0.288538	0.950562	0.148148	1.09871	423	12	69	22
0.290265	0.952809	0.148148	1.10096	424	12	69	21
0.299433	0.952809	0.135802	1.08861	424	11	70	21
0.309526	0.955056	0.135802	1.09086	425	11	70	20
0.311601	0.957303	0.135802	1.09311	426	11	70	19
0.3138	0.957303	0.123457	1.08076	426	10	71	19
0.316033	0.957303	0.111111	1.06841	426	9	72	19
0.317626	0.959551	0.111111	1.07066	427	9	72	18
0.319435	0.959551	0.0987654	1.05832	427	8	73	18
0.323688	0.959551	0.0864198	1.04597	427	7	74	18
0.329353	0.961798	0.0864198	1.04822	428	7	74	17
0.331819	0.964045	0.0864198	1.05046	429	7	74	16
0.332476	0.966292	0.0864198	1.05271	430	7	74	15
0.339475	0.968539	0.0864198	1.05496	431	7	74	14
0.350362	0.970787	0.0864198	1.05721	432	7	74	13
0.354873	0.973034	0.0864198	1.05945	433	7	74	12
0.35694	0.975281	0.0864198	1.0617	434	7	74	11
0.366262	0.977528	0.0864198	1.06395	435	7	74	10
0.379608	0.979775	0.0864198	1.0662	436	7	74	9
0.411153	0.982022	0.0864198	1.06844	437	7	74	8
0.456372	0.982022	0.0740741	1.0561	437	6	75	8
0.481444	0.98427	0.0740741	1.05834	438	6	75	7
0.492346	0.98427	0.0617284	1.046	438	5	76	7
0.50003	0.986517	0.0617284	1.04825	439	5	76	6
0.503617	0.986517	0.0493827	1.0359	439	4	77	6
0.509138	0.988764	0.0493827	1.03815	440	4	77	5
0.533562	0.991011	0.0493827	1.04039	441	4	77	4
0.55581	0.991011	0.037037	1.02805	441	3	78	4
0.561933	0.993258	0.037037	1.0303	442	3	78	3
0.567487	0.993258	0.0246914	1.01795	442	2	79	3
0.570331	0.993258	0.0123457	1.0056	442	1	80	3
0.589027	0.995506	0.0123457	1.00785	443	1	80	2
0.634835	0.997753	0.0123457	1.0101	444	1	80	1
0.676763	0.997753	0	0.997753	444	0	81	1
Inf	1	0	1	445	0	81	0

## Sheet: Glycan_BMI
threshold	specificity	sensitivity	youden	tn	tp	fn	fp
-Inf	0	1	1	0	81	0	445
0.00395487	0.00224719	1	1.00225	1	81	0	444
0.00643475	0.00449438	1	1.00449	2	81	0	443
0.00683971	0.00674157	1	1.00674	3	81	0	442
0.00711513	0.00898876	1	1.00899	4	81	0	441
0.00738504	0.011236	1	1.01124	5	81	0	440
0.00872806	0.0134831	1	1.01348	6	81	0	439
0.0105901	0.0157303	1	1.01573	7	81	0	438
0.011223	0.0179775	1	1.01798	8	81	0	437
0.0116124	0.0202247	1	1.02022	9	81	0	436
0.01217	0.0224719	1	1.02247	10	81	0	435
0.0126943	0.0247191	1	1.02472	11	81	0	434
0.0133368	0.0269663	1	1.02697	12	81	0	433
0.0137608	0.0292135	1	1.02921	13	81	0	432
0.0143681	0.0314607	1	1.03146	14	81	0	431
0.0150725	0.0314607	0.987654	1.01911	14	80	1	431
0.0160144	0.0337079	0.987654	1.02136	15	80	1	430
0.0169755	0.0359551	0.987654	1.02361	16	80	1	429
0.0173992	0.0382022	0.987654	1.02586	17	80	1	428
0.0176755	0.0404494	0.987654	1.0281	18	80	1	427
0.018343	0.0404494	0.975309	1.01576	18	79	2	427
0.0191292	0.0426966	0.975309	1.01801	19	79	2	426
0.0193676	0.0449438	0.975309	1.02025	20	79	2	425
0.0198745	0.047191	0.975309	1.0225	21	79	2	424
0.0203549	0.0494382	0.975309	1.02475	22	79	2	423
0.0206694	0.0516854	0.975309	1.02699	23	79	2	422
0.0209648	0.0539326	0.975309	1.02924	24	79	2	421
0.0211075	0.0561798	0.975309	1.03149	25	79	2	420
0.0212454	0.058427	0.975309	1.03374	26	79	2	419
0.0214376	0.0606742	0.975309	1.03598	27	79	2	418
0.0222278	0.0629213	0.975309	1.03823	28	79	2	417
0.0234257	0.0651685	0.975309	1.04048	29	79	2	416
0.0240941	0.0674157	0.975309	1.04272	30	79	2	415
0.0244004	0.0696629	0.975309	1.04497	31	79	2	414
0.024986	0.0696629	0.962963	1.03263	31	78	3	414
0.0254411	0.0719101	0.962963	1.03487	32	78	3	413
0.0257374	0.0741573	0.962963	1.03712	33	78	3	412
0.0260288	0.0764045	0.962963	1.03937	34	78	3	411
0.0261514	0.0786517	0.962963	1.04161	35	78	3	410
0.026251	0.0808989	0.962963	1.04386	36	78	3	409
0.0263084	0.0831461	0.962963	1.04611	37	78	3	408
0.0265694	0.0853933	0.962963	1.04836	38	78	3	407
0.0268639	0.0876404	0.962963	1.0506	39	78	3	406
0.0272241	0.0898876	0.962963	1.05285	40	78	3	405
0.0275644	0.0921348	0.962963	1.0551	41	78	3	404
0.0276261	0.094382	0.962963	1.05734	42	78	3	403
0.0276862	0.0966292	0.962963	1.05959	43	78	3	402
0.0278177	0.0988764	0.962963	1.06184	44	78	3	401
0.0284804	0.101124	0.962963	1.06409	45	78	3	400
0.0291871	0.103371	0.962963	1.06633	46	78	3	399
0.029495	0.105618	0.962963	1.06858	47	78	3	398
0.0296969	0.107865	0.962963	1.07083	48	78	3	397
0.0297573	0.110112	0.962963	1.07308	49	78	3	396
0.0299202	0.11236	0.962963	1.07532	50	78	3	395
0.0301763	0.114607	0.962963	1.07757	51	78	3	394
0.0304218	0.116854	0.962963	1.07982	52	78	3	393
0.0307008	0.119101	0.962963	1.08206	53	78	3	392
0.0308804	0.121348	0.962963	1.08431	54	78	3	391
0.0309041	0.123596	0.962963	1.08656	55	78	3	390
0.030969	0.125843	0.962963	1.08881	56	78	3	389
0.0311649	0.12809	0.962963	1.09105	57	78	3	388
0.031355	0.130337	0.962963	1.0933	58	78	3	387
0.0316076	0.132584	0.962963	1.09555	59	78	3	386
0.0321399	0.134831	0.962963	1.09779	60	78	3	385
0.0325148	0.137079	0.962963	1.10004	61	78	3	384
0.0326156	0.139326	0.962963	1.10229	62	78	3	383
0.0328349	0.141573	0.962963	1.10454	63	78	3	382
0.0337991	0.14382	0.962963	1.10678	64	78	3	381
0.0346033	0.146067	0.962963	1.10903	65	78	3	380
0.034704	0.148315	0.962963	1.11128	66	78	3	379
0.0350734	0.150562	0.962963	1.11352	67	78	3	378
0.0353997	0.152809	0.962963	1.11577	68	78	3	377
0.0356073	0.155056	0.962963	1.11802	69	78	3	376
0.035831	0.157303	0.962963	1.12027	70	78	3	375
0.0361939	0.159551	0.962963	1.12251	71	78	3	374
0.0366318	0.161798	0.962963	1.12476	72	78	3	373
0.0370339	0.164045	0.962963	1.12701	73	78	3	372
0.0373994	0.166292	0.962963	1.12926	74	78	3	371
0.0375155	0.168539	0.962963	1.1315	75	78	3	370
0.0375736	0.170787	0.962963	1.13375	76	78	3	369
0.0376378	0.173034	0.962963	1.136	77	78	3	368
0.037857	0.175281	0.962963	1.13824	78	78	3	367
0.0384134	0.177528	0.962963	1.14049	79	78	3	366
0.0390573	0.179775	0.962963	1.14274	80	78	3	365
0.0394786	0.179775	0.950617	1.13039	80	77	4	365
0.0397539	0.182022	0.950617	1.13264	81	77	4	364
0.0399411	0.18427	0.950617	1.13489	82	77	4	363
0.0404664	0.186517	0.950617	1.13713	83	77	4	362
0.0410331	0.188764	0.950617	1.13938	84	77	4	361
0.0413465	0.191011	0.950617	1.14163	85	77	4	360
0.0416355	0.193258	0.950617	1.14388	86	77	4	359
0.0420692	0.195506	0.950617	1.14612	87	77	4	358
0.0425079	0.197753	0.950617	1.14837	88	77	4	357
0.0427493	0.2	0.950617	1.15062	89	77	4	356
0.0429325	0.202247	0.950617	1.15286	90	77	4	355
0.0439873	0.204494	0.950617	1.15511	91	77	4	354
0.0451557	0.206742	0.950617	1.15736	92	77	4	353
0.045314	0.208989	0.950617	1.15961	93	77	4	352
0.045522	0.211236	0.950617	1.16185	94	77	4	351
0.0459228	0.213483	0.950617	1.1641	95	77	4	350
0.0465211	0.21573	0.950617	1.16635	96	77	4	349
0.046942	0.217978	0.950617	1.16859	97	77	4	348
0.0472198	0.220225	0.950617	1.17084	98	77	4	347
0.0476321	0.222472	0.950617	1.17309	99	77	4	346
0.047919	0.224719	0.950617	1.17534	100	77	4	345
0.0480385	0.226966	0.950617	1.17758	101	77	4	344
0.0480725	0.229213	0.950617	1.17983	102	77	4	343
0.0482889	0.231461	0.950617	1.18208	103	77	4	342
0.048574	0.233708	0.950617	1.18433	104	77	4	341
0.0490679	0.235955	0.950617	1.18657	105	77	4	340
0.0496074	0.238202	0.950617	1.18882	106	77	4	339
0.0499325	0.240449	0.950617	1.19107	107	77	4	338
0.0501322	0.242697	0.950617	1.19331	108	77	4	337
0.0501475	0.244944	0.950617	1.19556	109	77	4	336
0.0501911	0.247191	0.950617	1.19781	110	77	4	335
0.0502727	0.249438	0.950617	1.20006	111	77	4	334
0.0505302	0.251685	0.950617	1.2023	112	77	4	333
0.051274	0.253933	0.950617	1.20455	113	77	4	332
0.0518502	0.25618	0.950617	1.2068	114	77	4	331
0.0519048	0.258427	0.950617	1.20904	115	77	4	330
0.0523716	0.260674	0.950617	1.21129	116	77	4	329
0.0530159	0.262921	0.950617	1.21354	117	77	4	328
0.0532738	0.265169	0.950617	1.21579	118	77	4	327
0.0536075	0.267416	0.950617	1.21803	119	77	4	326
0.0539419	0.269663	0.950617	1.22028	120	77	4	325
0.0541068	0.27191	0.950617	1.22253	121	77	4	324
0.0542552	0.274157	0.950617	1.22477	122	77	4	323
0.0543281	0.274157	0.938272	1.21243	122	76	5	323
0.0545413	0.276404	0.938272	1.21468	123	76	5	322
0.054928	0.278652	0.938272	1.21692	124	76	5	321
0.0553241	0.280899	0.938272	1.21917	125	76	5	320
0.0555835	0.283146	0.938272	1.22142	126	76	5	319
0.055881	0.285393	0.938272	1.22366	127	76	5	318
0.0561724	0.28764	0.938272	1.22591	128	76	5	317
0.056447	0.289888	0.938272	1.22816	129	76	5	316
0.0569445	0.292135	0.938272	1.23041	130	76	5	315
0.0574592	0.294382	0.938272	1.23265	131	76	5	314
0.0577723	0.296629	0.938272	1.2349	132	76	5	313
0.0579007	0.298876	0.938272	1.23715	133	76	5	312
0.0580797	0.301124	0.938272	1.2394	134	76	5	311
0.0585835	0.303371	0.938272	1.24164	135	76	5	310
0.0590903	0.305618	0.938272	1.24389	136	76	5	309
0.059223	0.307865	0.938272	1.24614	137	76	5	308
0.0597252	0.310112	0.938272	1.24838	138	76	5	307
0.0606114	0.31236	0.938272	1.25063	139	76	5	306
0.0612539	0.314607	0.938272	1.25288	140	76	5	305
0.0616292	0.316854	0.938272	1.25513	141	76	5	304
0.0621058	0.319101	0.938272	1.25737	142	76	5	303
0.0627632	0.321348	0.938272	1.25962	143	76	5	302
0.0632753	0.323596	0.938272	1.26187	144	76	5	301
0.0637383	0.325843	0.938272	1.26411	145	76	5	300
0.0642152	0.32809	0.938272	1.26636	146	76	5	299
0.0644526	0.330337	0.938272	1.26861	147	76	5	298
0.0647741	0.332584	0.938272	1.27086	148	76	5	297
0.0651585	0.334831	0.938272	1.2731	149	76	5	296
0.0653617	0.337079	0.938272	1.27535	150	76	5	295
0.065497	0.339326	0.938272	1.2776	151	76	5	294
0.0655819	0.341573	0.938272	1.27984	152	76	5	293
0.0661978	0.34382	0.938272	1.28209	153	76	5	292
0.0668737	0.346067	0.938272	1.28434	154	76	5	291
0.0672574	0.348315	0.938272	1.28659	155	76	5	290
0.0683871	0.350562	0.938272	1.28883	156	76	5	289
0.0693142	0.350562	0.925926	1.27649	156	75	6	289
0.0696443	0.352809	0.925926	1.27873	157	75	6	288
0.0699498	0.355056	0.925926	1.28098	158	75	6	287
0.0702879	0.357303	0.925926	1.28323	159	75	6	286
0.0707061	0.359551	0.925926	1.28548	160	75	6	285
0.0708696	0.361798	0.925926	1.28772	161	75	6	284
0.0716129	0.364045	0.925926	1.28997	162	75	6	283
0.0727199	0.366292	0.925926	1.29222	163	75	6	282
0.0733292	0.368539	0.925926	1.29447	164	75	6	281
0.0740095	0.370787	0.925926	1.29671	165	75	6	280
0.0745067	0.373034	0.925926	1.29896	166	75	6	279
0.0745469	0.375281	0.925926	1.30121	167	75	6	278
0.0760776	0.377528	0.925926	1.30345	168	75	6	277
0.0776401	0.379775	0.925926	1.3057	169	75	6	276
0.0777469	0.382022	0.925926	1.30795	170	75	6	275
0.0779884	0.38427	0.925926	1.3102	171	75	6	274
0.0782898	0.386517	0.925926	1.31244	172	75	6	273
0.0788802	0.388764	0.925926	1.31469	173	75	6	272
0.0793767	0.391011	0.925926	1.31694	174	75	6	271
0.0794059	0.393258	0.925926	1.31918	175	75	6	270
0.0794595	0.395506	0.925926	1.32143	176	75	6	269
0.0799115	0.397753	0.925926	1.32368	177	75	6	268
0.0805594	0.4	0.925926	1.32593	178	75	6	267
0.0809528	0.402247	0.925926	1.32817	179	75	6	266
0.0812723	0.404494	0.925926	1.33042	180	75	6	265
0.0816387	0.406742	0.925926	1.33267	181	75	6	264
0.0819746	0.408989	0.925926	1.33491	182	75	6	263
0.0822402	0.411236	0.925926	1.33716	183	75	6	262
0.0825666	0.413483	0.925926	1.33941	184	75	6	261
0.0837085	0.41573	0.925926	1.34166	185	75	6	260
0.0846969	0.417978	0.925926	1.3439	186	75	6	259
0.0847543	0.420225	0.925926	1.34615	187	75	6	258
0.0847946	0.422472	0.925926	1.3484	188	75	6	257
0.0848509	0.424719	0.925926	1.35065	189	75	6	256
0.0849968	0.426966	0.925926	1.35289	190	75	6	255
0.0853872	0.426966	0.91358	1.34055	190	74	7	255
0.08571	0.429213	0.91358	1.34279	191	74	7	254
0.0858674	0.431461	0.91358	1.34504	192	74	7	253
0.0860445	0.433708	0.91358	1.34729	193	74	7	252
0.0861861	0.435955	0.91358	1.34954	194	74	7	251
0.0869163	0.438202	0.91358	1.35178	195	74	7	250
0.0881184	0.440449	0.91358	1.35403	196	74	7	249
0.0888547	0.442697	0.91358	1.35628	197	74	7	248
0.0890996	0.444944	0.91358	1.35852	198	74	7	247
0.0891771	0.447191	0.91358	1.36077	199	74	7	246
0.0892143	0.447191	0.901235	1.34843	199	73	8	246
0.0899095	0.449438	0.901235	1.35067	200	73	8	245
0.0906216	0.449438	0.888889	1.33833	200	72	9	245
0.0908649	0.451685	0.888889	1.34057	201	72	9	244
0.0911741	0.453933	0.888889	1.34282	202	72	9	243
0.0913589	0.45618	0.888889	1.34507	203	72	9	242
0.091706	0.458427	0.888889	1.34732	204	72	9	241
0.0920387	0.460674	0.888889	1.34956	205	72	9	240
0.0927116	0.462921	0.888889	1.35181	206	72	9	239
0.0934051	0.465169	0.888889	1.35406	207	72	9	238
0.0935935	0.467416	0.888889	1.3563	208	72	9	237
0.0939427	0.469663	0.888889	1.35855	209	72	9	236
0.0946313	0.47191	0.888889	1.3608	210	72	9	235
0.0953721	0.474157	0.888889	1.36305	211	72	9	234
0.0957137	0.476404	0.888889	1.36529	212	72	9	233
0.0958575	0.478652	0.888889	1.36754	213	72	9	232
0.0961075	0.480899	0.888889	1.36979	214	72	9	231
0.0964497	0.483146	0.888889	1.37203	215	72	9	230
0.0968361	0.485393	0.888889	1.37428	216	72	9	229
0.0972362	0.48764	0.888889	1.37653	217	72	9	228
0.0976499	0.489888	0.888889	1.37878	218	72	9	227
0.0987185	0.492135	0.888889	1.38102	219	72	9	226
0.0997168	0.494382	0.888889	1.38327	220	72	9	225
0.100334	0.496629	0.888889	1.38552	221	72	9	224
0.101265	0.498876	0.888889	1.38777	222	72	9	223
0.101781	0.501124	0.888889	1.39001	223	72	9	222
0.102076	0.503371	0.888889	1.39226	224	72	9	221
0.102449	0.505618	0.888889	1.39451	225	72	9	220
0.102774	0.505618	0.876543	1.38216	225	71	10	220
0.103316	0.507865	0.876543	1.38441	226	71	10	219
0.103739	0.510112	0.876543	1.38666	227	71	10	218
0.104639	0.51236	0.876543	1.3889	228	71	10	217
0.105542	0.514607	0.876543	1.39115	229	71	10	216
0.105657	0.516854	0.876543	1.3934	230	71	10	215
0.105991	0.519101	0.876543	1.39564	231	71	10	214
0.10683	0.521348	0.876543	1.39789	232	71	10	213
0.107505	0.523596	0.876543	1.40014	233	71	10	212
0.108241	0.525843	0.876543	1.40239	234	71	10	211
0.109342	0.52809	0.876543	1.40463	235	71	10	210
0.109932	0.530337	0.876543	1.40688	236	71	10	209
0.110138	0.532584	0.876543	1.40913	237	71	10	208
0.110253	0.532584	0.864198	1.39678	237	70	11	208
0.110483	0.534831	0.864198	1.39903	238	70	11	207
0.110836	0.537079	0.864198	1.40128	239	70	11	206
0.111023	0.539326	0.864198	1.40352	240	70	11	205
0.111693	0.541573	0.864198	1.40577	241	70	11	204
0.112492	0.54382	0.864198	1.40802	242	70	11	203
0.112773	0.54382	0.851852	1.39567	242	69	12	203
0.112877	0.546067	0.851852	1.39792	243	69	12	202
0.113092	0.548315	0.851852	1.40017	244	69	12	201
0.113451	0.550562	0.851852	1.40241	245	69	12	200
0.113676	0.552809	0.851852	1.40466	246	69	12	199
0.113879	0.555056	0.851852	1.40691	247	69	12	198
0.114619	0.557303	0.851852	1.40916	248	69	12	197
0.115281	0.559551	0.851852	1.4114	249	69	12	196
0.115571	0.561798	0.851852	1.41365	250	69	12	195
0.116565	0.564045	0.851852	1.4159	251	69	12	194
0.117365	0.566292	0.851852	1.41814	252	69	12	193
0.117537	0.566292	0.839506	1.4058	252	68	13	193
0.118007	0.568539	0.839506	1.40805	253	68	13	192
0.118404	0.570787	0.839506	1.41029	254	68	13	191
0.118777	0.573034	0.839506	1.41254	255	68	13	190
0.119193	0.575281	0.839506	1.41479	256	68	13	189
0.119777	0.577528	0.839506	1.41703	257	68	13	188
0.120398	0.579775	0.839506	1.41928	258	68	13	187
0.121127	0.582022	0.839506	1.42153	259	68	13	186
0.122025	0.58427	0.839506	1.42378	260	68	13	185
0.122445	0.586517	0.839506	1.42602	261	68	13	184
0.122689	0.588764	0.839506	1.42827	262	68	13	183
0.122926	0.591011	0.839506	1.43052	263	68	13	182
0.123982	0.593258	0.839506	1.43276	264	68	13	181
0.125183	0.595506	0.839506	1.43501	265	68	13	180
0.125526	0.597753	0.839506	1.43726	266	68	13	179
0.126301	0.6	0.839506	1.43951	267	68	13	178
0.126991	0.602247	0.839506	1.44175	268	68	13	177
0.127113	0.604494	0.839506	1.444	269	68	13	176
0.127342	0.606742	0.839506	1.44625	270	68	13	175
0.127505	0.608989	0.839506	1.44849	271	68	13	174
0.127856	0.611236	0.839506	1.45074	272	68	13	173
0.128165	0.613483	0.839506	1.45299	273	68	13	172
0.128358	0.61573	0.839506	1.45524	274	68	13	171
0.128614	0.617978	0.839506	1.45748	275	68	13	170
0.128997	0.620225	0.839506	1.45973	276	68	13	169
0.129639	0.622472	0.839506	1.46198	277	68	13	168
0.130592	0.624719	0.839506	1.46423	278	68	13	167
0.131426	0.626966	0.839506	1.46647	279	68	13	166
0.131723	0.629213	0.839506	1.46872	280	68	13	165
0.13205	0.629213	0.82716	1.45637	280	67	14	165
0.132362	0.631461	0.82716	1.45862	281	67	14	164
0.132755	0.633708	0.82716	1.46087	282	67	14	163
0.133156	0.635955	0.82716	1.46312	283	67	14	162
0.135009	0.635955	0.814815	1.45077	283	66	15	162
0.137031	0.638202	0.814815	1.45302	284	66	15	161
0.137368	0.640449	0.814815	1.45526	285	66	15	160
0.137787	0.642697	0.814815	1.45751	286	66	15	159
0.138595	0.644944	0.814815	1.45976	287	66	15	158
0.139894	0.647191	0.814815	1.46201	288	66	15	157
0.140771	0.649438	0.814815	1.46425	289	66	15	156
0.141479	0.651685	0.814815	1.4665	290	66	15	155
0.14219	0.651685	0.802469	1.45415	290	65	16	155
0.142438	0.653933	0.802469	1.4564	291	65	16	154
0.142755	0.65618	0.802469	1.45865	292	65	16	153
0.143119	0.658427	0.802469	1.4609	293	65	16	152
0.143604	0.660674	0.802469	1.46314	294	65	16	151
0.143921	0.662921	0.802469	1.46539	295	65	16	150
0.144066	0.665169	0.802469	1.46764	296	65	16	149
0.144226	0.667416	0.802469	1.46988	297	65	16	148
0.144347	0.669663	0.802469	1.47213	298	65	16	147
0.14445	0.67191	0.802469	1.47438	299	65	16	146
0.144739	0.674157	0.802469	1.47663	300	65	16	145
0.145168	0.676404	0.802469	1.47887	301	65	16	144
0.145485	0.678652	0.802469	1.48112	302	65	16	143
0.145608	0.680899	0.802469	1.48337	303	65	16	142
0.145868	0.683146	0.802469	1.48562	304	65	16	141
0.14627	0.685393	0.802469	1.48786	305	65	16	140
0.146865	0.68764	0.802469	1.49011	306	65	16	139
0.147612	0.689888	0.802469	1.49236	307	65	16	138
0.148141	0.692135	0.802469	1.4946	308	65	16	137
0.148527	0.692135	0.790123	1.48226	308	64	17	137
0.148818	0.692135	0.777778	1.46991	308	63	18	137
0.148943	0.694382	0.777778	1.47216	309	63	18	136
0.149013	0.694382	0.765432	1.45981	309	62	19	136
0.149123	0.696629	0.765432	1.46206	310	62	19	135
0.149835	0.696629	0.753086	1.44972	310	61	20	135
0.150741	0.698876	0.753086	1.45196	311	61	20	134
0.151236	0.698876	0.740741	1.43962	311	60	21	134
0.151506	0.701124	0.740741	1.44186	312	60	21	133
0.151762	0.703371	0.740741	1.44411	313	60	21	132
0.152199	0.705618	0.740741	1.44636	314	60	21	131
0.152449	0.705618	0.728395	1.43401	314	59	22	131
0.152817	0.707865	0.728395	1.43626	315	59	22	130
0.154469	0.710112	0.728395	1.43851	316	59	22	129
0.155989	0.71236	0.728395	1.44075	317	59	22	128
0.156654	0.714607	0.728395	1.443	318	59	22	127
0.157609	0.716854	0.728395	1.44525	319	59	22	126
0.15943	0.716854	0.716049	1.4329	319	58	23	126
0.160954	0.719101	0.716049	1.43515	320	58	23	125
0.161326	0.721348	0.716049	1.4374	321	58	23	124
0.161667	0.723596	0.716049	1.43964	322	58	23	123
0.162027	0.725843	0.716049	1.44189	323	58	23	122
0.163028	0.72809	0.716049	1.44414	324	58	23	121
0.164116	0.72809	0.703704	1.43179	324	57	24	121
0.164888	0.730337	0.703704	1.43404	325	57	24	120
0.166045	0.732584	0.703704	1.43629	326	57	24	119
0.166825	0.734831	0.703704	1.43854	327	57	24	118
0.167034	0.737079	0.703704	1.44078	328	57	24	117
0.168486	0.737079	0.691358	1.42844	328	56	25	117
0.170041	0.739326	0.691358	1.43068	329	56	25	116
0.17071	0.739326	0.679012	1.41834	329	55	26	116
0.172096	0.741573	0.679012	1.42059	330	55	26	115
0.173269	0.74382	0.679012	1.42283	331	55	26	114
0.174441	0.746067	0.679012	1.42508	332	55	26	113
0.176042	0.748315	0.679012	1.42733	333	55	26	112
0.177045	0.750562	0.679012	1.42957	334	55	26	111
0.177486	0.752809	0.679012	1.43182	335	55	26	110
0.17758	0.755056	0.679012	1.43407	336	55	26	109
0.177915	0.757303	0.679012	1.43632	337	55	26	108
0.178287	0.759551	0.679012	1.43856	338	55	26	107
0.178779	0.761798	0.679012	1.44081	339	55	26	106
0.179344	0.764045	0.679012	1.44306	340	55	26	105
0.179973	0.766292	0.679012	1.4453	341	55	26	104
0.180787	0.766292	0.666667	1.43296	341	54	27	104
0.181263	0.768539	0.666667	1.43521	342	54	27	103
0.181744	0.770787	0.666667	1.43745	343	54	27	102
0.182559	0.770787	0.654321	1.42511	343	53	28	102
0.183338	0.773034	0.654321	1.42735	344	53	28	101
0.185009	0.775281	0.654321	1.4296	345	53	28	100
0.186877	0.775281	0.641975	1.41726	345	52	29	100
0.187717	0.777528	0.641975	1.4195	346	52	29	99
0.188166	0.779775	0.641975	1.42175	347	52	29	98
0.188282	0.782022	0.641975	1.424	348	52	29	97
0.18887	0.78427	0.641975	1.42624	349	52	29	96
0.189443	0.78427	0.62963	1.4139	349	51	30	96
0.189662	0.786517	0.62963	1.41615	350	51	30	95
0.189879	0.786517	0.617284	1.4038	350	50	31	95
0.190672	0.788764	0.617284	1.40605	351	50	31	94
0.192789	0.791011	0.617284	1.4083	352	50	31	93
0.194481	0.793258	0.617284	1.41054	353	50	31	92
0.195015	0.795506	0.617284	1.41279	354	50	31	91
0.19621	0.795506	0.604938	1.40044	354	49	32	91
0.19756	0.795506	0.592593	1.3881	354	48	33	91
0.197973	0.795506	0.580247	1.37575	354	47	34	91
0.198188	0.797753	0.580247	1.378	355	47	34	90
0.19897	0.8	0.580247	1.38025	356	47	34	89
0.200367	0.802247	0.580247	1.38249	357	47	34	88
0.20115	0.804494	0.580247	1.38474	358	47	34	87
0.202173	0.804494	0.567901	1.3724	358	46	35	87
0.203527	0.806742	0.567901	1.37464	359	46	35	86
0.20409	0.806742	0.555556	1.3623	359	45	36	86
0.205233	0.808989	0.555556	1.36454	360	45	36	85
0.206339	0.811236	0.555556	1.36679	361	45	36	84
0.206849	0.811236	0.54321	1.35445	361	44	37	84
0.207284	0.813483	0.54321	1.35669	362	44	37	83
0.207523	0.81573	0.54321	1.35894	363	44	37	82
0.207702	0.817978	0.54321	1.36119	364	44	37	81
0.208773	0.820225	0.54321	1.36343	365	44	37	80
0.210475	0.822472	0.54321	1.36568	366	44	37	79
0.211155	0.824719	0.54321	1.36793	367	44	37	78
0.211193	0.826966	0.54321	1.37018	368	44	37	77
0.211433	0.829213	0.54321	1.37242	369	44	37	76
0.214083	0.829213	0.530864	1.36008	369	43	38	76
0.217234	0.831461	0.530864	1.36232	370	43	38	75
0.218249	0.833708	0.530864	1.36457	371	43	38	74
0.218981	0.835955	0.530864	1.36682	372	43	38	73
0.220217	0.835955	0.518519	1.35447	372	42	39	73
0.221122	0.835955	0.506173	1.34213	372	41	40	73
0.22144	0.838202	0.506173	1.34438	373	41	40	72
0.222444	0.838202	0.493827	1.33203	373	40	41	72
0.223769	0.840449	0.493827	1.33428	374	40	41	71
0.224734	0.842697	0.493827	1.33652	375	40	41	70
0.225305	0.844944	0.493827	1.33877	376	40	41	69
0.226488	0.844944	0.481481	1.32643	376	39	42	69
0.229267	0.847191	0.481481	1.32867	377	39	42	68
0.231655	0.849438	0.481481	1.33092	378	39	42	67
0.23309	0.851685	0.481481	1.33317	379	39	42	66
0.235484	0.851685	0.469136	1.32082	379	38	43	66
0.237645	0.853933	0.469136	1.32307	380	38	43	65
0.239331	0.85618	0.469136	1.32532	381	38	43	64
0.240526	0.858427	0.469136	1.32756	382	38	43	63
0.240788	0.860674	0.469136	1.32981	383	38	43	62
0.241296	0.860674	0.45679	1.31746	383	37	44	62
0.242591	0.862921	0.45679	1.31971	384	37	44	61
0.243955	0.865169	0.45679	1.32196	385	37	44	60
0.245934	0.867416	0.45679	1.32421	386	37	44	59
0.247617	0.869663	0.45679	1.32645	387	37	44	58
0.24887	0.869663	0.444444	1.31411	387	36	45	58
0.25143	0.869663	0.432099	1.30176	387	35	46	58
0.253571	0.87191	0.432099	1.30401	388	35	46	57
0.255327	0.87191	0.419753	1.29166	388	34	47	57
0.256435	0.874157	0.419753	1.29391	389	34	47	56
0.257463	0.876404	0.419753	1.29616	390	34	47	55
0.26072	0.878652	0.419753	1.2984	391	34	47	54
0.264993	0.878652	0.407407	1.28606	391	33	48	54
0.267044	0.880899	0.407407	1.28831	392	33	48	53
0.267803	0.880899	0.395062	1.27596	392	32	49	53
0.268644	0.880899	0.382716	1.26361	392	31	50	53
0.269147	0.880899	0.37037	1.25127	392	30	51	53
0.271296	0.880899	0.358025	1.23892	392	29	52	53
0.274456	0.883146	0.358025	1.24117	393	29	52	52
0.276218	0.885393	0.358025	1.24342	394	29	52	51
0.277387	0.88764	0.358025	1.24567	395	29	52	50
0.278198	0.889888	0.358025	1.24791	396	29	52	49
0.279035	0.892135	0.358025	1.25016	397	29	52	48
0.280501	0.894382	0.358025	1.25241	398	29	52	47
0.282275	0.896629	0.358025	1.25465	399	29	52	46
0.283838	0.898876	0.358025	1.2569	400	29	52	45
0.284451	0.901124	0.358025	1.25915	401	29	52	44
0.286955	0.903371	0.358025	1.2614	402	29	52	43
0.289469	0.905618	0.358025	1.26364	403	29	52	42
0.289744	0.905618	0.345679	1.2513	403	28	53	42
0.29018	0.905618	0.333333	1.23895	403	27	54	42
0.29056	0.907865	0.333333	1.2412	404	27	54	41
0.292261	0.907865	0.320988	1.22885	404	26	55	41
0.294103	0.907865	0.308642	1.21651	404	25	56	41
0.296794	0.910112	0.308642	1.21875	405	25	56	40
0.301895	0.91236	0.308642	1.221	406	25	56	39
0.306693	0.914607	0.308642	1.22325	407	25	56	38
0.308949	0.916854	0.308642	1.2255	408	25	56	37
0.309185	0.919101	0.308642	1.22774	409	25	56	36
0.309325	0.921348	0.308642	1.22999	410	25	56	35
0.312741	0.921348	0.296296	1.21764	410	24	57	35
0.316486	0.923596	0.296296	1.21989	411	24	57	34
0.316949	0.925843	0.296296	1.22214	412	24	57	33
0.318458	0.92809	0.296296	1.22439	413	24	57	32
0.322442	0.930337	0.296296	1.22663	414	24	57	31
0.32616	0.932584	0.296296	1.22888	415	24	57	30
0.329347	0.932584	0.283951	1.21653	415	23	58	30
0.333332	0.932584	0.271605	1.20419	415	22	59	30
0.335302	0.932584	0.259259	1.19184	415	21	60	30
0.33576	0.934831	0.259259	1.19409	416	21	60	29
0.336746	0.934831	0.246914	1.18175	416	20	61	29
0.339019	0.937079	0.246914	1.18399	417	20	61	28
0.346645	0.937079	0.234568	1.17165	417	19	62	28
0.358936	0.939326	0.234568	1.17389	418	19	62	27
0.366241	0.941573	0.234568	1.17614	419	19	62	26
0.367986	0.94382	0.234568	1.17839	420	19	62	25
0.369053	0.94382	0.222222	1.16604	420	18	63	25
0.374826	0.946067	0.222222	1.16829	421	18	63	24
0.380453	0.948315	0.222222	1.17054	422	18	63	23
0.382502	0.950562	0.222222	1.17278	423	18	63	22
0.387521	0.952809	0.222222	1.17503	424	18	63	21
0.393197	0.955056	0.222222	1.17728	425	18	63	20
0.396273	0.955056	0.209877	1.16493	425	17	64	20
0.404125	0.957303	0.209877	1.16718	426	17	64	19
0.413855	0.959551	0.209877	1.16943	427	17	64	18
0.417845	0.961798	0.209877	1.17167	428	17	64	17
0.42242	0.961798	0.197531	1.15933	428	16	65	17
0.427828	0.964045	0.197531	1.16158	429	16	65	16
0.430797	0.966292	0.197531	1.16382	430	16	65	15
0.432408	0.968539	0.197531	1.16607	431	16	65	14
0.436177	0.970787	0.197531	1.16832	432	16	65	13
0.440987	0.973034	0.197531	1.17056	433	16	65	12
0.446631	0.975281	0.197531	1.17281	434	16	65	11
0.45168	0.975281	0.185185	1.16047	434	15	66	11
0.457162	0.977528	0.185185	1.16271	435	15	66	10
0.461539	0.977528	0.17284	1.15037	435	14	67	10
0.463143	0.977528	0.160494	1.13802	435	13	68	10
0.466124	0.979775	0.160494	1.14027	436	13	68	9
0.469534	0.982022	0.160494	1.14252	437	13	68	8
0.474471	0.982022	0.148148	1.13017	437	12	69	8
0.480066	0.982022	0.135802	1.11782	437	11	70	8
0.482818	0.982022	0.123457	1.10548	437	10	71	8
0.485842	0.98427	0.123457	1.10773	438	10	71	7
0.489012	0.986517	0.123457	1.10997	439	10	71	6
0.492168	0.986517	0.111111	1.09763	439	9	72	6
0.496611	0.986517	0.0987654	1.08528	439	8	73	6
0.501379	0.988764	0.0987654	1.08753	440	8	73	5
0.508734	0.991011	0.0987654	1.08978	441	8	73	4
0.525664	0.991011	0.0864198	1.07743	441	7	74	4
0.548855	0.991011	0.0740741	1.06509	441	6	75	4
0.571714	0.991011	0.0617284	1.05274	441	5	76	4
0.58594	0.991011	0.0493827	1.04039	441	4	77	4
0.589842	0.993258	0.0493827	1.04264	442	4	77	3
0.616504	0.993258	0.037037	1.0303	442	3	78	3
0.647873	0.995506	0.037037	1.03254	443	3	78	2
0.675697	0.997753	0.037037	1.03479	444	3	78	1
0.722726	1	0.037037	1.03704	445	3	78	0
0.749232	1	0.0246914	1.02469	445	2	79	0
0.785447	1	0.0123457	1.01235	445	1	80	0
-Inf	1	0	1	445	0	81	0
